# Supplementary material for: Network Pharmacology and Experiment Verification to Explore the Potential Mechanism of Yin-Huo-Tang for Lung Adenocarcinoma Recurrence
Source: Research Square preprint supplement (doi:10.21203/rs.3.rs-956330/v1), 2021-10-12
Supplement: Supplementary file 1 [file 4a372f88a3b277a63a32f29e.xlsx]

## Sheet: metabolome_pos
ID	mz	rt	引火汤
M81T293	81.0329	292.623	2.31324e+07
M81T106	81.0327	105.503	3.08067e+07
M81T651	81.0331	650.898	5.37354e+06
M81T143	81.0328	142.85	1.94176e+07
M81T94	81.033	93.7378	6.79196e+07
M81T359	81.0328	359.32	1.53873e+07
M81T659	81.0331	658.953	5.55487e+06
M81T68	81.0525	68.0903	2.34179e+06
M81T35	81.0526	34.5397	2.17746e+06
M81T563	81.069	563.297	1.88118e+07
M81T649	81.0692	649.338	1.30439e+07
M81T818	81.0692	818.418	8.78993e+06
M81T703	81.069	703.35	1.34315e+07
M81T545	81.0689	545.203	1.49026e+07
M82T353	81.5201	352.65	1.27074e+08
M82T497	81.5192	497.214	1.89959e+08
M82T794	81.5189	793.649	8.00653e+07
M82T432	81.5197	431.64	2.15593e+08
M82T665	81.5191	664.745	2.78519e+08
M82T626	81.5196	626.042	1.433e+09
M82T346	81.5202	345.848	1.43643e+08
M82T688	81.5197	687.95	3.65275e+08
M82T388	81.5196	387.763	1.53633e+08
M82T807	81.5193	807.232	9.64292e+07
M82T469	81.5192	469.252	2.55385e+08
M82T676	81.5191	675.866	3.85421e+08
M82T698	81.5197	697.952	2.52355e+08
M82T572	81.5192	571.523	3.84601e+08
M82T709	81.5201	709.106	2.92422e+08
M82T488	81.5192	488.437	1.87965e+08
M82T728	81.5198	728.25	5.29801e+08
M82T75_1	81.5198	74.9588	4.77093e+08
M82T533	81.5194	532.526	7.8914e+08
M82T458	81.5194	457.576	1.99579e+08
M82T218	81.5202	217.866	1.45684e+08
M82T756	81.5201	755.537	7.20949e+08
M82T507	81.5195	507.343	2.21002e+08
M82T827	81.5197	827.271	4.0553e+07
M82T279	81.5201	279.039	1.22035e+08
M82T316	81.5202	315.701	1.28402e+08
M82T364	81.5201	363.58	2.7942e+08
M82T402	81.5196	401.963	4.84034e+08
M82T448	81.5195	447.531	2.39502e+08
M82T480	81.5192	479.527	1.83671e+08
M82T148	81.5202	148.117	2.85222e+08
M82T35_1	81.5197	34.5397	2.95631e+08
M82T783	81.5192	782.558	1.49078e+08
M82T381	81.5202	380.63	1.60069e+08
M82T299	81.5202	299.493	1.25318e+08
M82T60	82.0133	59.9075	1.91077e+07
M82T190	82.0134	189.571	3.72327e+06
M82T135	82.0135	134.574	1.03954e+07
M82T75_2	82.0133	74.9588	2.1322e+09
M82T644	82.0215	643.727	1.17228e+07
M82T785	82.0213	785.136	7.87698e+06
M82T636	82.0215	636.473	1.12011e+07
M82T711	82.0212	710.534	2.67657e+07
M82T46	82.0218	46.447	7.50983e+06
M82T628	82.0215	627.58	2.24751e+07
M82T751	82.0208	751.333	1.2865e+07
M82T611	82.0215	611.145	1.57937e+07
M82T35_2	82.0217	34.5397	1.78834e+07
M82T528	82.0648	528.185	2.31223e+06
M83T75_1	82.5366	74.9588	4.6497e+09
M83T75_2	83.0137	74.9588	2.64559e+08
M83T61	83.0376	61.1538	8.91367e+06
M83T75_3	83.0376	74.9588	8.50276e+08
M83T216	83.0376	216.359	2.8896e+06
M83T595	83.0375	595.066	2.60441e+06
M83T35	83.0379	34.5397	1.79958e+06
M83T44	83.0376	44.1485	3.56528e+06
M83T144	83.0488	143.959	2.16089e+07
M83T558	83.0486	557.967	8.33493e+06
M83T106	83.0489	105.503	4.53191e+07
M83T393	83.0487	392.715	1.14018e+07
M83T181	83.0487	181.154	9.84529e+06
M83T339	83.0488	339.085	9.58421e+06
M83T92	83.0488	91.7174	4.67272e+07
M83T600	83.0602	599.621	3.92567e+08
M83T791	83.0602	790.802	4.94425e+08
M83T830	83.0602	830.193	3.26137e+08
M83T750	83.06	749.96	3.58175e+08
M83T669	83.0602	668.867	3.28559e+08
M83T475	83.06	475.007	2.04482e+08
M83T660	83.0602	660.455	4.4169e+08
M83T647	83.0602	646.794	4.17108e+08
M83T816	83.06	815.517	3.99517e+08
M83T728	83.06	728.25	3.16423e+08
M83T838	83.06	837.524	2.24955e+08
M83T623	83.06	623.11	2.98153e+08
M83T736	83.06	735.7	3.2177e+08
M83T516	83.0602	516.214	2.91309e+08
M83T531	83.0602	531.127	3.65791e+08
M83T544	83.06	544.056	4.0804e+08
M83T96	83.06	95.7572	3.24015e+07
M83T823	83.0602	822.881	3.18703e+08
M83T506	83.06	505.855	2.38381e+08
M83T683	83.0602	683.436	3.60045e+08
M83T633	83.0602	633.476	3.87277e+08
M83T758	83.0602	758.236	3.85827e+08
M83T703	83.06	703.35	1.03397e+09
M83T780	83.0602	780.043	3.63639e+08
M83T487	83.06	486.885	2.28936e+08
M83T610	83.0602	609.592	2.82778e+08
M83T772	83.0602	772.206	3.04758e+08
M83T800	83.0602	800.484	4.15047e+08
M83T573	83.0602	573.072	8.22905e+08
M83T563	83.0849	563.297	5.37797e+06
M83T114	83.0852	114.15	2.23118e+06
M83T777	83.0844	777.245	7.43547e+06
M83T133	83.0852	133.259	7.26359e+06
M83T384	83.0852	383.536	5.24943e+06
M84T570	83.5164	570.01	3.93012e+06
M84T38	83.5355	38.3208	2.38873e+06
M84T44	83.5355	44.1485	6.41759e+06
M84T57	83.5355	57.4179	8.66385e+06
M84T598	83.5356	598.125	3.45819e+06
M84T75_1	83.5354	74.9588	9.78396e+08
M84T75_2	84.0109	74.9588	3.11756e+08
M84T160	84.0439	159.633	6.65313e+07
M84T809	84.0438	808.678	3.40651e+07
M84T662	84.0438	661.979	4.61331e+07
M84T311	84.0438	311.445	8.83141e+07
M84T582	84.0439	581.625	2.7863e+07
M84T574	84.0439	574.363	2.79629e+07
M84T117	84.0438	116.689	4.81901e+07
M84T764	84.0439	763.856	3.19769e+07
M84T603	84.0438	602.513	3.81817e+07
M84T409	84.0438	409.271	3.66078e+07
M84T392	84.0439	391.678	4.5517e+07
M84T649	84.0438	649.338	3.36579e+07
M84T705_1	84.0439	704.715	4.35698e+07
M84T432	84.0439	431.64	3.13551e+07
M84T78_1	84.0441	78.3841	4.81456e+07
M84T558	84.0439	557.967	4.6558e+07
M84T110_1	84.0441	110.047	7.78718e+07
M84T325	84.0439	325.35	6.91941e+07
M84T475	84.0438	475.007	3.45313e+07
M84T757	84.0439	757.001	2.90993e+07
M84T682	84.0439	681.885	4.29801e+07
M84T830	84.0439	830.193	4.92742e+07
M84T129	84.0438	129.234	8.15473e+07
M84T623	84.0439	623.11	3.27441e+07
M84T516	84.0438	516.214	4.53611e+07
M84T544	84.0439	544.056	5.19188e+07
M84T210	84.0441	210.186	8.61045e+07
M84T418	84.0439	417.676	3.50293e+07
M84T642	84.0438	642.211	2.81816e+07
M84T733	84.0439	732.773	8.7976e+07
M84T401	84.0439	400.59	3.47219e+07
M84T488	84.0439	488.437	2.86896e+07
M84T672	84.0439	671.649	3.60049e+07
M84T218	84.0438	217.866	6.89956e+07
M84T802	84.0438	801.685	2.73241e+07
M84T381	84.0438	380.63	4.40008e+07
M84T455	84.0439	454.739	6.72468e+07
M84T70	84.0441	70.3428	7.39585e+07
M84T567	84.0439	567.1	3.34746e+07
M84T90	84.0438	89.6999	2.15853e+08
M84T338	84.0438	337.767	4.02624e+07
M84T197	84.0441	196.644	2.12951e+08
M84T504	84.0439	504.466	3.63652e+07
M84T62	84.0441	62.1777	9.92337e+07
M84T371_1	84.0438	370.777	4.27692e+07
M84T592	84.0439	592.067	4.05082e+07
M84T528	84.0439	528.185	9.71925e+06
M84T632	84.0438	631.982	3.91741e+07
M84T466	84.0439	466.162	3.38944e+07
M84T611	84.0438	611.145	4.28487e+07
M84T36	84.0635	35.8675	6.44669e+06
M84T164	84.0803	163.846	1.90886e+08
M84T579	84.0803	578.816	9.59349e+07
M84T829	84.0803	828.73	2.53967e+08
M84T522	84.0803	522.177	7.36309e+07
M84T705_2	84.0803	704.715	9.70571e+07
M84T663	84.0803	663.287	6.94797e+07
M84T348	84.0806	348.488	1.25091e+08
M84T644	84.0803	643.727	6.08314e+07
M84T78_2	84.0805	78.3841	1.45587e+08
M84T436	84.0806	436.069	1.60206e+08
M84T293	84.0803	292.623	2.79963e+08
M84T493	84.0803	492.895	9.35995e+07
M84T225	84.0803	224.729	4.52553e+08
M84T626	84.0803	626.042	2.00032e+08
M84T566	84.0804	565.79	7.8377e+07
M84T271	84.0803	270.983	1.69139e+08
M84T420	84.0803	420.274	1.48354e+08
M84T313	84.0806	312.85	1.43087e+08
M84T199	84.0801	199.43	5.48015e+08
M84T320	84.0803	319.758	1.15781e+08
M84T770	84.0803	769.702	1.14307e+08
M84T503	84.0803	503.046	6.04213e+07
M84T334	84.0803	333.715	1.54961e+08
M84T250	84.0803	250.144	1.92189e+08
M84T143	84.0802	142.85	3.15319e+08
M84T302	84.0803	302.191	1.60562e+08
M84T683	84.0803	683.436	8.39076e+07
M84T673	84.0803	672.956	7.97338e+07
M84T110_2	84.0801	110.047	2.71682e+08
M84T530	84.0803	529.713	5.16784e+07
M84T465	84.0803	464.668	1.43007e+08
M84T239	84.0803	238.605	2.43816e+08
M84T719	84.0803	719.215	9.43606e+07
M84T758	84.0803	758.236	1.04995e+08
M84T394	84.0806	393.934	1.07059e+08
M84T512	84.0803	511.77	9.47333e+07
M84T747	84.0803	746.977	1.03906e+08
M84T32	84.0801	32.4171	1.00118e+08
M84T591	84.0803	590.607	1.34491e+08
M84T371_2	84.0803	370.777	1.1818e+08
M84T382	84.0803	382.125	1.15898e+08
M84T545	84.0803	545.203	1.67692e+08
M84T799	84.0803	799.089	1.01987e+08
M84T652	84.0803	651.956	8.95992e+07
M84T173	84.0801	173.407	2.23273e+08
M84T403	84.0803	403.447	9.93505e+07
M84T361	84.0806	360.794	1.2066e+08
M84T734	84.0803	734.269	1.16299e+08
M84T155	84.0803	155.197	2.09212e+08
M84T694	84.0803	693.81	8.75936e+07
M85T84	84.9107	83.5661	1.8919e+07
M85T128	84.959	127.944	1.07976e+07
M85T139	84.959	138.766	4.82366e+06
M85T75	84.9589	74.9588	1.99237e+08
M85T48	84.9589	47.6391	8.46616e+07
M85T148	84.9593	148.117	1.54625e+07
M85T791	85.028	790.802	6.2322e+06
M85T263	85.0281	262.529	3.02668e+08
M85T223	85.0278	223.474	2.38959e+08
M85T158	85.0279	157.773	4.74695e+08
M85T190	85.0277	189.571	5.23849e+08
M85T232	85.0277	231.773	1.59086e+08
M85T293	85.0281	292.623	1.07445e+09
M85T180	85.028	179.75	4.43853e+08
M85T524	85.0279	523.735	1.7185e+07
M85T239	85.0277	238.605	2.20783e+08
M85T537	85.028	536.761	1.35966e+07
M85T649	85.0278	649.338	2.39379e+08
M85T660	85.0279	660.455	5.72886e+07
M85T516	85.0278	516.214	1.38101e+07
M85T199	85.0277	199.43	3.35603e+08
M85T503	85.0279	503.046	1.82048e+07
M85T389	85.028	389.035	4.90394e+07
M85T670	85.0279	670.166	2.55125e+07
M85T143_1	85.0279	142.85	6.99447e+08
M85T620	85.0278	620.172	4.95039e+07
M85T739	85.028	738.697	1.62128e+07
M85T683	85.028	683.436	2.81485e+07
M85T838	85.028	837.524	2.17853e+06
M85T210	85.0277	210.186	3.15602e+08
M85T94	85.0282	93.7378	2.29218e+09
M85T719	85.0279	719.215	2.36654e+07
M85T559	85.0278	559.459	4.92305e+07
M85T607	85.0281	606.774	1.56471e+07
M85T703	85.0278	703.35	4.73605e+07
M85T545	85.0279	545.203	2.73672e+07
M85T592	85.0279	592.067	1.86702e+07
M85T632	85.0278	631.982	4.70656e+07
M85T443	85.028	443.256	8.53795e+07
M85T361	85.0279	360.794	2.12131e+08
M85T800	85.028	800.484	6.9073e+06
M85T576	85.028	575.878	1.11369e+07
M85T772	85.0281	772.206	7.07517e+06
M85T823	85.028	822.881	1.00278e+07
M85T104	85.0282	104.493	3.12052e+09
M85T761	85.028	760.916	5.39001e+06
M85T783	85.028	782.558	3.30351e+06
M85T140	85.0394	140.286	6.42407e+06
M85T126	85.0393	125.598	9.48101e+06
M85T176	85.0475	175.952	4.80128e+07
M85T320	85.0642	319.758	1.59232e+07
M85T143_2	85.0838	142.85	1.88615e+07
M85T110	85.0839	110.047	1.43671e+07
M86T158	86.0315	157.773	1.97084e+07
M86T293	86.0316	292.623	4.17722e+07
M86T649	86.0314	649.338	9.00946e+06
M86T143	86.0315	142.85	2.95504e+07
M86T94	86.0315	93.7378	9.63424e+07
M86T104	86.0315	104.493	1.19288e+08
M86T294	86.0594	293.896	6.85982e+07
M86T180	86.0597	179.75	5.88378e+07
M86T393	86.0594	392.715	1.21543e+08
M86T91	86.0597	90.7088	6.30219e+08
M86T237_1	86.0596	237.171	6.37103e+08
M86T248	86.07	247.692	1.46858e+06
M86T237_2	86.0856	237.171	860896
M86T223	86.0962	223.474	8.67732e+08
M86T114	86.0961	114.15	7.06013e+07
M86T246	86.0961	246.372	1.03482e+09
M86T75	86.0957	74.9588	5.43761e+07
M87T82	86.9082	82.0569	8.3439e+06
M87T61	86.9926	61.1538	2.86559e+06
M87T55	86.9926	54.867	1.02355e+06
M87T74	86.9925	73.8324	6.50585e+08
M87T164	87.0075	163.846	1.73597e+07
M87T95	87.0323	94.7467	7.15379e+06
M87T187	87.0435	186.709	5.50284e+07
M87T103	87.0435	103.423	1.10775e+08
M87T393_1	87.0431	392.715	1.76438e+07
M87T248	87.0441	247.692	9.50283e+07
M87T165	87.044	165.217	2.69775e+07
M87T91_1	87.0438	90.7088	7.13244e+08
M87T367	87.0668	366.514	2.65995e+06
M87T393_2	87.063	392.715	3.75615e+06
M87T91_2	87.0631	90.7088	2.45906e+07
M87T237	87.0632	237.171	2.45948e+07
M87T263	87.0804	262.529	1.35752e+07
M87T86	87.0781	85.6453	9.34122e+06
M87T295	87.0804	295.356	8.28902e+06
M87T223	87.0995	223.474	4.65232e+07
M87T246	87.0995	246.372	5.68925e+07
M88T35	87.5091	34.5397	691631
M88T783	87.5094	782.558	5.72286e+06
M88T75	87.9931	74.9588	7.62749e+07
M88T48	88.0221	47.6391	6.97792e+06
M88T67	88.0223	66.9841	3.47428e+06
M88T87	88.0394	86.6643	1.72798e+08
M88T66	88.0391	65.7101	1.1897e+07
M88T237	88.0639	237.171	643698
M88T158	88.0752	157.773	1.2715e+08
M88T163	88.0752	162.728	1.11408e+08
M88T456	88.0757	456.126	1.79364e+08
M88T61	88.0753	61.1538	6.13547e+08
M88T725	88.0757	725.212	8.65081e+07
M88T102	88.0753	102.247	9.32569e+07
M88T229	88.0752	229.059	1.06318e+08
M88T540	88.0756	539.764	1.91909e+08
M88T401	88.0753	400.59	1.33175e+08
M88T411	88.0753	410.542	2.26695e+08
M88T788	88.0757	787.856	1.379e+08
M88T558	88.0757	557.967	1.4201e+08
M88T241	88.0753	241.368	1.59212e+08
M88T748	88.0757	748.486	9.54176e+07
M88T394	88.0753	393.934	1.63791e+08
M88T367	88.0752	366.514	2.30858e+08
M88T481	88.0754	481.042	2.12797e+08
M88T807	88.0757	807.232	1.60665e+08
M88T531	88.0756	531.127	2.56008e+08
M88T345	88.0752	344.555	4.07396e+08
M88T503	88.0757	503.046	4.88689e+08
M88T267	88.0753	267.171	1.04592e+08
M88T221_1	88.0752	220.676	1.47448e+08
M88T95	88.0752	94.7467	8.49882e+07
M88T577	88.0753	577.366	5.76667e+08
M88T121	88.0753	120.525	1.66652e+08
M88T838	88.0757	837.524	4.35012e+07
M88T210	88.0753	210.186	1.47788e+08
M88T736	88.0757	735.7	7.36622e+07
M88T177	88.0752	177.295	1.15345e+08
M88T111	88.0752	111.382	1.51976e+08
M88T625	88.0753	624.608	1.06406e+09
M88T132	88.0753	131.949	1.32744e+08
M88T760	88.0757	759.605	6.19164e+07
M88T320	88.0753	319.758	3.18934e+08
M88T433	88.0757	433.111	1.59119e+08
M88T194	88.0753	193.823	1.99346e+08
M88T466	88.0757	466.162	1.86131e+08
M88T679	88.0757	678.909	9.87659e+08
M88T299	88.0752	299.493	1.46947e+08
M88T423	88.0754	423.199	1.90619e+08
M88T276	88.0753	276.414	1.67259e+08
M88T448	88.0757	447.531	1.51951e+08
M88T772	88.0757	772.206	4.75146e+07
M88T379	88.0753	379.194	1.94183e+08
M88T254	88.0753	254.446	2.10361e+08
M88T148	88.0752	148.117	1.37746e+08
M88T826	88.0757	825.74	5.96529e+07
M88T329	88.1119	329.481	6.54572e+07
M88T221_2	88.1118	220.676	4.7799e+06
M89T33_1	88.5091	33.467	1.46682e+07
M89T75_1	88.9903	74.9588	9.10404e+07
M89T767	89.0074	766.742	1.13779e+07
M89T748	89.0084	748.486	1.4179e+07
M89T33_2	89.0082	33.467	3.44077e+07
M89T789	89.0074	789.293	6.39056e+07
M89T760	89.0082	759.605	1.43871e+07
M89T728	89.0086	728.25	1.62416e+07
M89T741	89.0082	741.302	1.29253e+07
M89T121	89.0226	120.525	1.31686e+07
M89T101	89.0594	101.161	6.85396e+07
M89T230	89.0597	230.321	6.79628e+07
M89T147	89.0597	146.742	1.01903e+08
M89T263	89.0597	262.529	2.19257e+08
M89T57	89.0597	57.4179	2.88875e+08
M89T207	89.0597	207.393	7.21427e+07
M89T167	89.0594	166.613	1.81846e+08
M89T291	89.0597	291.307	6.44478e+07
M89T198	89.0597	198.072	7.96182e+07
M89T118	89.0597	118.116	8.65473e+07
M89T503	89.0718	503.046	646420
M89T676	89.0717	675.866	665059
M89T63_1	89.0789	63.4448	1.84327e+07
M89T33_3	89.1071	33.467	9.9909e+06
M89T63_2	89.1074	63.4448	1.22825e+07
M89T75_2	89.1071	74.9588	3.75916e+07
M89T49	89.1071	48.7362	5.27353e+06
M90T725	89.5059	725.212	3.36166e+08
M90T644	89.5067	643.727	4.83733e+07
M90T746	89.5049	745.603	3.85265e+08
M90T794	89.5068	793.649	8.59998e+07
M90T33_1	89.5054	33.467	2.68027e+08
M90T665_1	89.5067	664.745	8.89073e+07
M90T626	89.505	626.042	7.41897e+07
M90T688	89.5067	687.95	1.22498e+08
M90T636	89.505	636.473	5.31136e+07
M90T698	89.5059	697.952	1.30237e+08
M90T816	89.5051	815.517	7.928e+07
M90T758_1	89.5052	758.236	3.54148e+08
M90T832	89.5054	831.709	6.92246e+07
M90T70	89.5068	70.3428	3.2428e+07
M90T784	89.5067	783.78	1.47173e+08
M90T655	89.5068	654.542	4.98125e+07
M90T133	89.507	133.259	4.95812e+07
M90T713	89.5067	713.464	2.47627e+08
M90T803	89.5051	802.88	9.20267e+07
M90T677	89.5067	677.376	1.09257e+08
M90T75	89.5449	74.9588	4.95173e+07
M90T33_2	90.0076	33.467	1.81215e+07
M90T57	90.008	57.4179	1.5824e+06
M90T68_1	90.0076	68.0903	873551
M90T48	90.0077	47.6391	5.36611e+06
M90T226	90.055	226.202	4.69958e+07
M90T791	90.055	790.802	4.4496e+07
M90T557	90.055	556.816	2.56256e+07
M90T101	90.0545	101.161	6.94497e+07
M90T147	90.055	146.742	2.5224e+07
M90T750	90.055	749.96	2.73562e+07
M90T665_2	90.0551	664.745	6.55151e+07
M90T158	90.055	157.773	3.82606e+07
M90T496	90.0551	495.779	2.28105e+07
M90T137	90.055	137.373	3.47393e+07
M90T325	90.0551	325.35	2.68341e+07
M90T388	90.0552	387.763	2.08943e+07
M90T474	90.0551	473.597	2.9e+07
M90T129	90.055	129.234	3.78069e+07
M90T395	90.055	395.264	1.7926e+07
M90T758_2	90.055	758.236	2.41385e+07
M90T765	90.055	765.406	2.8238e+07
M90T408	90.0552	407.724	3.16977e+07
M90T343	90.0551	343.226	4.92248e+07
M90T267	90.055	267.171	3.44778e+07
M90T531	90.0551	531.127	2.68089e+07
M90T506	90.0551	505.855	2.77451e+07
M90T88_1	90.0547	87.6739	2.07573e+09
M90T121	90.055	120.525	4.25037e+07
M90T594	90.055	593.62	4.68644e+07
M90T110	90.055	110.047	4.55484e+07
M90T838	90.0549	837.524	1.34441e+07
M90T172	90.055	171.935	3.47306e+07
M90T239	90.0551	238.605	3.41282e+07
M90T547	90.055	546.651	3.57868e+07
M90T515	90.0551	514.727	2.90766e+07
M90T449	90.055	448.978	5.81007e+07
M90T703	90.0549	703.35	3.96672e+07
M90T568	90.0551	568.464	3.69549e+07
M90T201	90.055	200.766	7.21178e+07
M90T487	90.0552	486.885	2.48643e+07
M90T257	90.055	257.155	2.74275e+07
M90T690	90.055	689.5	3.79735e+07
M90T610	90.0551	609.592	4.17317e+07
M90T299	90.0551	299.493	6.18499e+07
M90T773	90.055	773.437	2.36402e+07
M90T280	90.0551	280.345	3.68519e+07
M90T802	90.055	801.685	2.09429e+07
M90T426	90.0551	425.909	3.83891e+07
M90T823	90.055	822.881	5.27636e+07
M90T635	90.055	635.022	8.00355e+07
M90T730	90.0544	729.798	7.53373e+07
M90T368	90.0551	367.949	4.51623e+07
M90T68_2	90.0627	68.0903	2.55107e+06
M90T88_2	90.091	87.6739	2.51731e+07
M91T747_1	90.5047	746.977	3.31058e+07
M91T765	90.5053	765.406	9.71512e+07
M91T794_1	90.5059	793.649	1.11815e+08
M91T33	90.506	33.467	4.30053e+07
M91T811	90.5059	811.413	3.28197e+08
M91T772	90.5059	772.206	7.77215e+07
M91T731	90.5054	731.347	2.48525e+08
M91T69_1	90.5067	69.2834	2.27425e+06
M91T757	90.5068	757.001	9.55943e+07
M91T783	90.506	782.558	1.31559e+08
M91T456	90.5259	456.126	2.7049e+08
M91T60	90.5256	59.9075	6.36126e+08
M91T540	90.5259	539.764	1.37096e+08
M91T416	90.5266	416.239	1.42417e+08
M91T36	90.5258	35.8675	3.14452e+08
M91T353	90.5259	352.65	1.74367e+08
M91T230	90.5259	230.321	2.48365e+08
M91T129	90.5259	129.234	1.40519e+08
M91T794_2	90.5263	793.649	3.56051e+07
M91T432	90.5259	431.64	1.88079e+08
M91T102	90.5257	102.247	1.52651e+07
M91T644	90.5259	643.727	2.36062e+08
M91T158	90.5259	157.773	1.02194e+08
M91T388	90.5259	387.763	1.51391e+08
M91T626	90.5258	626.042	2.38915e+08
M91T136	90.5259	135.971	2.38228e+08
M91T399	90.5259	399.046	2.65323e+08
M91T806	90.5262	805.823	2.65684e+07
M91T481	90.5259	481.042	1.55608e+08
M91T381	90.5259	380.63	2.25764e+08
M91T533	90.5258	532.526	1.89739e+08
M91T724	90.5259	723.682	4.43284e+08
M91T833	90.526	833.029	6.615e+06
M91T244	90.5264	244.085	4.40766e+08
M91T423	90.5266	423.199	1.35482e+08
M91T577	90.5259	577.366	1.28622e+08
M91T673	90.5265	672.956	7.39216e+08
M91T75_1	90.5261	74.9588	1.1241e+09
M91T87	90.5258	86.6643	3.49956e+07
M91T747_2	90.5259	746.977	1.22888e+08
M91T568	90.5259	568.464	1.36205e+08
M91T471	90.5266	470.602	2.1096e+08
M91T507	90.5255	507.343	3.44709e+08
M91T820	90.5256	819.78	1.76436e+07
M91T551	90.5259	550.919	1.33057e+08
M91T610	90.5259	609.592	2.60757e+08
M91T784	90.5259	783.78	6.58017e+07
M91T521	90.5265	520.739	1.43455e+08
M91T195	90.526	195.23	7.70462e+08
M91T113	90.5259	112.781	1.23681e+08
M91T364	90.5258	363.58	3.5546e+08
M91T773	90.5259	773.437	7.44242e+07
M91T442	90.5266	442.005	1.51853e+08
M91T589	90.5259	589.053	2.80144e+08
M91T280	90.5258	280.345	6.8814e+08
M91T148	90.5259	148.117	1.97091e+08
M91T317	90.5265	317.199	1.11564e+09
M91T45_1	90.5257	45.3435	5.36301e+08
M91T137	90.9475	137.373	5.08562e+06
M91T150	90.9473	149.65	5.43671e+06
M91T69_2	90.9477	69.2834	9.53833e+06
M91T82	90.9767	82.0569	9.89006e+06
M91T178	91.0175	178.408	9.96737e+06
M91T59	91.0279	58.6151	2.24381e+07
M91T45_2	91.0272	45.3435	3.08342e+07
M91T51	91.0272	51.1942	1.61013e+07
M91T65	91.0272	64.6213	2.14596e+07
M91T75_2	91.0272	74.9588	6.66229e+07
M91T35	91.0275	34.5397	1.41715e+07
M91T291	91.0386	291.307	3.95031e+06
M91T94	91.0386	93.7378	1.52344e+07
M91T453	91.0543	453.317	1.41278e+07
M91T669	91.0542	668.867	8.22617e+06
M91T649	91.0537	649.338	1.63621e+07
M91T682	91.0541	681.885	9.08504e+06
M91T345	91.0539	344.555	1.1044e+07
M91T88	91.0583	87.6739	6.68223e+07
M91T562	91.0542	561.955	4.26913e+07
M91T718	91.0541	717.959	8.40258e+06
M91T777	91.0535	777.245	1.12789e+07
M91T703	91.0536	703.35	1.7668e+07
M91T218	91.0543	217.866	2.22887e+07
M91T543	91.0542	542.766	2.10616e+07
M91T402	91.054	401.963	7.27517e+06
M91T694	91.0541	693.81	7.49468e+06
M91T792	91.054	792.146	8.48397e+06
M92T829	91.5029	828.73	3.4651e+07
M92T725	91.5046	725.212	8.07674e+07
M92T809	91.5029	808.678	3.69023e+07
M92T33_1	91.5034	33.467	1.69626e+07
M92T764	91.5028	763.856	3.24002e+07
M92T754	91.5029	753.987	4.77511e+07
M92T818	91.5046	818.418	2.99361e+07
M92T792	91.5036	792.146	9.34391e+07
M92T75	91.5423	74.9588	1.8708e+08
M92T33_2	92.0047	33.467	756767
M92T237	92.0253	237.171	716400
M93T758	92.5026	758.236	5.79233e+06
M93T75	92.5222	74.9588	1.60192e+07
M93T48	92.5226	47.6391	2.4843e+07
M93T98	93.0545	97.7824	2.06288e+07
M93T833	93.0567	833.029	1.87468e+06
M93T649	93.0697	649.338	7.28104e+06
M93T451	93.07	450.503	7.14177e+06
M93T472	93.07	472.132	8.2322e+06
M93T682	93.0699	681.885	5.21762e+06
M93T535	93.0697	535.329	9.35249e+06
M93T345	93.0696	344.555	6.7198e+06
M93T670	93.0697	670.166	5.57514e+06
M93T562	93.0697	561.955	1.70697e+07
M93T547	93.0697	546.651	8.30195e+06
M93T719	93.0698	719.215	3.99186e+06
M93T703	93.0697	703.35	9.00513e+06
M93T148	93.0695	148.117	6.71658e+06
M94T446	94.0284	445.984	1.07404e+06
M94T398	94.0446	397.878	1.41994e+08
M94T75_1	94.0448	74.9588	5.98829e+09
M94T35	94.0448	34.5397	2.2245e+08
M94T809	94.0459	808.678	1.65526e+08
M94T804	94.0454	804.327	1.77115e+08
M94T600	94.0453	599.621	3.26627e+08
M94T61	94.0455	61.1538	5.88809e+07
M94T663	94.0454	663.287	3.41843e+08
M94T794	94.0453	793.649	2.86809e+08
M94T688	94.0454	687.95	4.37431e+08
M94T388	94.0454	387.763	1.48181e+08
M94T531	94.0455	531.127	1.43267e+09
M94T698	94.0453	697.952	3.88422e+08
M94T572	94.0454	571.523	4.53017e+08
M94T832	94.0459	831.709	8.77785e+07
M94T674	94.0453	674.402	4.88041e+08
M94T820	94.0459	819.78	1.39443e+08
M94T611	94.0454	611.145	5.13896e+08
M94T757	94.0453	757.001	1.28924e+09
M94T734	94.0455	734.269	5.73723e+08
M94T713	94.0454	713.464	6.14515e+08
M94T588	94.0454	587.521	3.02394e+08
M94T480	94.0459	479.527	7.4397e+08
M94T635	94.0454	635.022	8.48939e+08
M94T783	94.0454	782.558	3.49042e+08
M94T96	94.0647	95.7572	1.1545e+07
M94T331	94.0652	330.809	1.30055e+07
M94T75_2	94.0746	74.9588	8.53494e+06
M95T241	94.5332	241.368	9.06823e+06
M95T603	94.547	602.513	9.0676e+07
M95T663_1	94.547	663.287	2.62602e+07
M95T638	94.5437	637.996	5.40214e+07
M95T688	94.5434	687.95	8.95182e+07
M95T554	94.5451	553.936	4.8323e+07
M95T824	94.5469	824.311	1.62477e+07
M95T577	94.5471	577.366	2.27259e+07
M95T838	94.5469	837.524	3.14547e+06
M95T75_1	94.546	74.9588	1.04338e+09
M95T718	94.5436	717.959	2.76258e+07
M95T747	94.547	746.977	4.51708e+07
M95T568	94.5468	568.464	2.50579e+07
M95T756	94.5471	755.537	5.85705e+07
M95T784	94.547	783.78	6.91823e+07
M95T655_1	94.5469	654.542	2.13141e+07
M95T773_1	94.547	773.437	2.80012e+07
M95T734	94.5434	734.269	5.29362e+07
M95T35_1	94.545	34.5397	3.04516e+07
M95T205	95.0236	204.747	1.40572e+06
M95T101	95.0491	101.161	1.96548e+07
M95T725	95.0436	725.212	1.59394e+08
M95T663_2	95.0436	663.287	4.51783e+07
M95T540	95.0443	539.764	2.84479e+07
M95T644	95.0436	643.727	5.0172e+07
M95T293	95.0492	292.623	1.13425e+07
M95T345	95.0491	344.555	1.15187e+07
M95T698	95.0446	697.952	4.65652e+07
M95T709	95.0446	709.106	4.63837e+07
M95T63	95.0485	63.4448	7.64649e+06
M95T75_2	95.0437	74.9588	8.45145e+08
M95T762	95.0436	762.439	1.44175e+08
M95T218	95.0492	217.866	2.15611e+07
M95T690	95.0436	689.5	7.33483e+07
M95T674	95.0445	674.402	6.3352e+07
M95T551	95.0443	550.919	2.29631e+07
M95T655_2	95.0446	654.542	3.12954e+07
M95T802_1	95.0436	801.685	1.43813e+08
M95T54	95.0493	53.6731	1.03774e+07
M95T35_2	95.0443	34.5397	2.89494e+07
M95T246	95.0605	246.372	1.38847e+07
M95T209	95.0602	208.905	4.93001e+06
M95T311	95.0856	311.445	8.19415e+06
M95T263	95.0858	262.529	1.47982e+07
M95T435	95.0858	434.589	1.47816e+07
M95T119	95.0857	119.433	1.34367e+07
M95T270	95.0857	269.528	1.1779e+07
M95T605	95.0857	605.264	1.10782e+07
M95T764	95.0855	763.856	1.32836e+07
M95T669	95.0857	668.867	2.7042e+07
M95T475	95.0858	475.007	1.2753e+07
M95T649	95.0849	649.338	3.97603e+07
M95T451	95.0858	450.503	1.26189e+07
M95T513	95.0856	513.285	9.05106e+06
M95T420	95.0857	420.274	1.1691e+07
M95T813	95.0856	812.862	1.08203e+07
M95T682	95.0857	681.885	2.12682e+07
M95T390	95.0855	390.432	1.54973e+07
M95T535	95.0857	535.329	1.13751e+07
M95T524	95.0858	523.735	1.08573e+07
M95T129	95.0857	129.234	1.26464e+07
M95T461	95.0858	460.537	1.08113e+07
M95T167	95.0855	166.613	2.17713e+07
M95T334	95.0855	333.715	5.68591e+06
M95T594	95.0856	593.62	9.1777e+06
M95T503	95.0857	503.046	8.2766e+06
M95T139	95.0856	138.766	1.27613e+07
M95T562	95.0857	561.955	1.44686e+08
M95T586	95.0856	585.968	1.0755e+07
M95T834	95.0855	834.486	5.67203e+06
M95T295	95.0855	295.356	9.43755e+06
M95T751	95.0856	751.333	2.33041e+07
M95T740	95.0857	740.014	1.03741e+07
M95T703	95.0858	703.35	4.11105e+07
M95T320	95.0856	319.758	6.49119e+06
M95T304	95.0856	303.513	5.67062e+06
M95T487	95.0856	486.885	8.24036e+06
M95T359	95.0855	359.32	5.33174e+06
M95T545	95.0848	545.203	4.48231e+07
M95T716	95.0856	716.403	2.04379e+07
M95T279	95.0857	279.039	1.06715e+07
M95T632	95.0857	631.982	1.6654e+07
M95T403	95.0856	403.447	7.68349e+06
M95T216	95.0856	216.359	2.14551e+07
M95T191	95.0856	190.962	3.67097e+07
M95T237	95.0857	237.171	3.0342e+07
M95T773_2	95.0856	773.437	1.0212e+07
M95T821	95.0857	821.334	8.99736e+06
M95T694	95.0857	693.81	2.10916e+07
M95T576	95.0858	575.878	1.5318e+07
M95T802_2	95.0855	801.685	9.21407e+06
M95T254	95.0857	254.446	1.17208e+07
M96T75	95.5456	74.9588	6.76723e+07
M96T206	96.0076	205.903	6.29508e+06
M96T119	96.0448	119.433	2.34172e+08
M96T106	96.0447	105.503	4.51099e+08
M96T143	96.0447	142.85	9.12122e+07
M96T446	96.0448	445.984	4.29691e+07
M96T95	96.0441	94.7467	2.69698e+07
M96T177	96.0445	177.295	4.99804e+07
M96T245	96.0447	245.199	2.79914e+07
M96T331	96.0805	330.809	2.99677e+06
M96T342	96.0806	341.802	2.40099e+06
M96T66	96.0885	65.7101	1.24764e+06
M97T75	96.5342	74.9588	2.06821e+07
M97T36	96.9603	35.8675	2.39204e+06
M97T52	96.9603	52.4521	2.70303e+06
M97T45	96.9603	45.3435	2.76596e+06
M97T66	96.9603	65.7101	2.78659e+06
M97T31	96.9722	31.4047	1.08032e+06
M97T72	97.0082	71.5935	1.3887e+07
M97T164	97.0284	163.846	2.03718e+08
M97T158	97.0284	157.773	3.46594e+08
M97T119	97.0284	119.433	4.10691e+08
M97T223	97.028	223.474	1.499e+08
M97T190	97.0284	189.571	3.03137e+08
M97T293	97.0284	292.623	5.31198e+08
M97T180	97.0284	179.75	2.63393e+08
M97T649	97.0287	649.338	1.22374e+08
M97T106_1	97.0284	105.503	1.14809e+09
M97T199	97.0284	199.43	1.68676e+08
M97T260_1	97.0284	259.74	1.64245e+08
M97T143	97.0284	142.85	4.5658e+08
M97T620	97.0287	620.172	3.49968e+07
M97T210	97.0284	210.186	2.16701e+08
M97T94	97.0284	93.7378	1.75095e+09
M97T703	97.0286	703.35	2.25716e+07
M97T545	97.0284	545.203	4.30231e+07
M97T632	97.0287	631.982	3.58074e+07
M97T659	97.0287	658.953	4.61114e+07
M97T60	97.0395	59.9075	1.61428e+06
M97T68	97.0394	68.0903	1.88774e+06
M97T42	97.0395	41.798	3.38359e+06
M97T35	97.0395	34.5397	2.05956e+06
M97T50	97.0395	50.041	5.50004e+06
M97T106_2	97.048	105.503	2.15433e+07
M97T121	97.0477	120.525	7.37746e+06
M97T446	97.0476	445.984	1.33403e+06
M97T750	97.0761	749.96	4.10403e+07
M97T836	97.0762	836.034	1.31859e+07
M97T807	97.0762	807.232	1.99485e+07
M97T824	97.0762	824.311	2.00769e+07
M97T816	97.0762	815.517	1.11718e+07
M97T197	97.0759	196.644	4.46399e+06
M97T132	97.076	131.949	5.31195e+06
M97T792	97.0762	792.146	1.66542e+07
M97T783	97.0762	782.558	8.77561e+06
M97T413	97.1014	413.295	7.61241e+06
M97T187	97.1013	186.709	1.34568e+07
M97T453	97.1015	453.317	5.20901e+06
M97T230	97.1013	230.321	9.90717e+06
M97T286	97.1012	285.9	4.40173e+06
M97T147	97.1012	146.742	9.21911e+06
M97T137	97.1013	137.373	1.03075e+07
M97T271	97.1013	270.983	1.02954e+07
M97T279	97.1013	279.039	6.94997e+06
M97T260_2	97.1013	259.74	8.0143e+06
M97T250	97.1014	250.144	1.00169e+07
M97T221	97.1012	220.676	8.1134e+06
M97T168	97.1012	167.804	5.93912e+06
M97T201	97.1013	200.766	5.42875e+06
M97T240	97.1014	239.913	1.03509e+07
M97T423	97.1014	423.199	1.127e+07
M97T209	97.1013	208.905	5.70631e+06
M97T155	97.1013	155.197	5.69063e+06
M97T216	97.4026	216.359	1.67771e+06
M98T46	97.5146	46.447	1.4915e+07
M98T69	97.5146	69.2834	7.87749e+06
M98T32_1	97.5148	32.4171	1.98051e+07
M98T68	97.9685	68.0903	2.76257e+06
M98T32_2	97.9685	32.4171	5.72344e+06
M98T38	97.9918	38.3208	3.08763e+08
M98T411	97.9919	410.542	7.99711e+07
M98T665	97.9919	664.745	5.25993e+07
M98T639	97.9909	639.219	1.59981e+08
M98T420	97.9919	420.274	7.62164e+07
M98T398	97.991	397.878	1.05767e+08
M98T388	97.991	387.763	7.31899e+07
M98T698	97.9909	697.952	5.61096e+07
M98T572	97.991	571.523	1.13939e+08
M98T510	97.9909	510.333	7.51175e+07
M98T552	97.991	552.452	8.00452e+07
M98T709	97.991	709.106	4.59596e+07
M98T533	97.9909	532.526	8.81893e+07
M98T757_1	97.9919	757.001	2.50164e+07
M98T365	97.9919	365.061	1.07587e+08
M98T655	97.991	654.542	5.70873e+07
M98T379	97.991	379.194	8.85837e+07
M98T677	97.9919	677.376	9.05885e+07
M98T748	98.0138	748.486	6.93373e+06
M98T794	98.0137	793.649	3.58558e+06
M98T770	98.0137	769.702	6.82483e+06
M98T75	98.0136	74.9588	2.80086e+07
M98T718	98.0138	717.959	1.05016e+07
M98T48	98.0137	47.6391	1.39137e+07
M98T741	98.0137	741.302	8.52077e+06
M98T731	98.0137	731.347	6.60093e+06
M98T32_3	98.0138	32.4171	4.57904e+07
M98T757_2	98.0137	757.001	8.96316e+06
M98T62	98.0138	62.1777	5.67994e+06
M98T783	98.0137	782.558	7.41869e+06
M98T100	98.032	100.146	7.23039e+07
M98T95	98.032	94.7467	8.84339e+07
M98T107	98.032	106.513	5.31437e+07
M98T649	98.0313	649.338	4.10309e+06
M98T181	98.0316	181.154	9.42758e+06
M98T291	98.0318	291.307	2.81782e+07
M98T143	98.032	142.85	2.52389e+07
M98T106	98.0599	105.503	2.63746e+07
M98T336	98.0603	336.344	3.10653e+07
M98T346	98.0601	345.848	1.7321e+08
M98T321	98.0604	321.198	3.71612e+07
M98T111	98.0963	111.382	2.69918e+07
M99T829	98.5115	828.73	4.4155e+07
M99T78_1	98.5118	78.3841	5.50477e+07
M99T804	98.5115	804.327	5.52889e+07
M99T770	98.5116	769.702	9.48988e+07
M99T795	98.5115	795.165	3.32224e+07
M99T698	98.5118	697.952	7.37826e+07
M99T758	98.5115	758.236	1.4331e+08
M99T69	98.5118	69.2834	1.18316e+08
M99T32_1	98.5135	32.4171	3.71931e+08
M99T787_1	98.5116	786.569	8.42058e+07
M99T61	98.955	61.1538	3.91863e+06
M99T68_1	98.955	68.0903	3.56173e+06
M99T46	98.955	46.447	6.33086e+06
M99T119_1	98.9845	119.433	1.10143e+08
M99T101	98.9844	101.161	1.72246e+08
M99T163_1	98.9845	162.728	1.19532e+08
M99T113	98.9845	112.781	1.69329e+08
M99T135	98.9845	134.574	1.03776e+08
M99T91	98.9845	90.7088	1.2213e+09
M99T38	98.9944	38.3208	1.31946e+06
M99T68_2	99.0111	68.0903	2.06994e+06
M99T765	99.0116	765.406	3.68378e+06
M99T32_2	99.0136	32.4171	1.80141e+07
M99T42	99.0112	41.798	3.34236e+06
M99T50	99.011	50.041	2.81665e+06
M99T133	99.0128	133.259	4.74794e+06
M99T744	99.0118	744.182	1.01987e+07
M99T158	99.0438	157.773	1.08155e+08
M99T190	99.0439	189.571	9.32195e+07
M99T293	99.0436	292.623	1.59899e+08
M99T180	99.0439	179.75	8.36052e+07
M99T250	99.0439	250.144	2.54269e+08
M99T143	99.0438	142.85	1.40195e+08
M99T95	99.0438	94.7467	3.56843e+08
M99T198_1	99.0445	198.072	9.39541e+07
M99T321	99.0445	321.198	1.37725e+08
M99T104	99.0436	104.493	4.4751e+08
M99T263	99.0549	262.529	3.99334e+06
M99T59	99.0551	58.6151	1.11882e+06
M99T48	99.0552	47.6391	1.71949e+06
M99T67	99.0551	66.9841	1.06431e+06
M99T39	99.0552	39.4128	1.53248e+06
M99T346_1	99.0636	345.848	7.66504e+06
M99T102	99.0802	102.247	5.02175e+07
M99T97	99.0802	96.7698	2.19278e+07
M99T372	99.0808	372.152	3.47983e+07
M99T119_2	99.0801	119.433	8.33415e+07
M99T727	99.0808	726.707	1.69385e+07
M99T746	99.0807	745.603	2.10726e+07
M99T626	99.0808	626.042	1.9853e+07
M99T563	99.0806	563.297	3.71035e+07
M99T78_2	99.0805	78.3841	3.92886e+07
M99T270	99.08	269.528	7.91731e+07
M99T225	99.0808	224.729	3.04617e+08
M99T682	99.0808	681.885	2.39078e+07
M99T167	99.0801	166.613	1.43839e+08
M99T619	99.0808	618.683	2.21525e+07
M99T90	99.0802	89.6999	3.71261e+07
M99T335	99.0808	334.966	4.81518e+07
M99T287	99.0808	287.148	6.68908e+07
M99T260	99.0801	259.74	9.77119e+07
M99T478	99.0808	477.989	2.32354e+07
M99T145	99.0801	145.382	7.90085e+07
M99T651	99.0808	650.898	6.15059e+07
M99T672	99.0801	671.649	2.46894e+07
M99T346_2	99.0808	345.848	3.43318e+07
M99T547	99.0806	546.651	3.32873e+07
M99T111	99.0802	111.382	5.14587e+07
M99T394	99.0808	393.934	3.58471e+07
M99T504	99.0808	504.466	3.8435e+07
M99T703	99.0808	703.35	3.40062e+07
M99T279	99.0801	279.039	6.40761e+07
M99T487	99.0808	486.885	3.56613e+07
M99T132	99.0801	131.949	5.97552e+07
M99T716	99.0802	716.403	2.33587e+07
M99T734	99.0801	734.269	1.15455e+07
M99T463	99.0809	463.271	2.16928e+07
M99T433	99.0808	433.111	1.1701e+08
M99T527	99.0808	526.676	5.09244e+07
M99T403	99.0809	403.447	2.7471e+07
M99T359	99.0808	359.32	4.41232e+07
M99T757	99.08	757.001	2.12977e+07
M99T188	99.08	188.126	7.86701e+07
M99T787_2	99.0807	786.569	1.13962e+08
M99T318	99.0809	318.497	7.89199e+07
M99T198_2	99.0801	198.072	8.01262e+07
M99T694	99.0802	693.81	1.88581e+07
M99T384	99.0809	383.536	3.89223e+07
M99T595	99.0808	595.066	5.38393e+07
M99T301	99.0808	300.782	7.39918e+07
M99T152	99.0914	152.375	8.35848e+06
M99T163_2	99.0914	162.728	4.05617e+06
M100T829_1	99.5123	828.73	7.5822e+06
M100T785	99.5124	785.136	2.39963e+07
M100T816	99.5124	815.517	1.51956e+07
M100T758	99.5124	758.236	1.47032e+07
M100T32	99.5119	32.4171	4.3984e+07
M100T151	99.5118	151.016	8.15444e+06
M100T46	99.5309	46.447	3.13886e+08
M100T75_1	99.5309	74.9588	2.32564e+08
M100T148	99.5309	148.117	4.74672e+07
M100T59	100.025	58.6151	2.44757e+07
M100T75_2	100.024	74.9588	2.74272e+09
M100T48	100.024	47.6391	1.46687e+07
M100T177	100.023	177.295	1.87484e+07
M100T142	100.039	141.825	2.15531e+07
M100T293	100.047	292.623	6.65721e+06
M100T321	100.047	321.198	5.08779e+06
M100T104	100.047	104.493	2.17695e+07
M100T733	100.075	732.773	1.92069e+07
M100T161	100.075	161.494	2.94423e+07
M100T739	100.076	738.697	1.83126e+07
M100T187	100.076	186.709	3.27179e+07
M100T456	100.076	456.126	2.54835e+07
M100T477	100.076	476.554	2.85742e+07
M100T369	100.076	369.321	5.81971e+07
M100T226	100.076	226.202	3.73903e+07
M100T829_2	100.076	828.73	3.72385e+07
M100T180	100.076	179.75	2.99859e+07
M100T686	100.076	686.47	8.1939e+07
M100T663	100.076	663.287	2.08847e+07
M100T129	100.075	129.234	2.74663e+07
M100T788	100.076	787.856	3.11532e+07
M100T155	100.076	155.197	2.78537e+07
M100T432	100.076	431.64	2.70374e+07
M100T416	100.076	416.239	4.64076e+07
M100T388	100.076	387.763	1.84618e+07
M100T314	100.076	314.259	4.99978e+07
M100T329	100.076	329.481	5.49679e+07
M100T355	100.076	355.41	5.2239e+07
M100T78	100.075	78.3841	2.01975e+07
M100T626	100.076	626.042	3.49208e+07
M100T136	100.075	135.971	3.97835e+07
M100T806	100.076	805.823	4.3759e+07
M100T398	100.076	397.878	3.36437e+07
M100T524	100.076	523.735	1.24363e+08
M100T381	100.076	380.63	3.06443e+07
M100T345	100.076	344.555	8.03348e+07
M100T267	100.076	267.171	1.80073e+08
M100T108	100.076	107.537	4.07121e+07
M100T145	100.076	145.382	3.64533e+07
M100T577	100.076	577.366	2.56061e+07
M100T121	100.076	120.525	5.54269e+07
M100T488	100.076	488.437	2.09055e+07
M100T171	100.075	170.665	3.67941e+07
M100T780	100.076	780.043	1.38619e+07
M100T747	100.076	746.977	2.22629e+07
M100T601	100.076	601.04	2.63776e+07
M100T93	100.076	92.7272	5.63085e+07
M100T642	100.076	642.211	2.74513e+07
M100T586	100.076	585.968	2.30656e+07
M100T716	100.076	716.403	6.03122e+07
M100T466	100.076	466.162	2.56775e+07
M100T298	100.076	298.135	2.61179e+07
M100T195	100.076	195.23	3.3395e+07
M100T772	100.076	772.206	2.26959e+07
M100T655	100.076	654.542	2.25862e+07
M100T442	100.076	442.005	3.46963e+07
M100T761	100.075	760.916	3.84535e+07
M100T31_1	100.084	31.4047	1.02205e+06
M100T68	100.084	68.0903	4.55236e+06
M100T55	100.084	54.867	6.90196e+06
M100T45	100.084	45.3435	3.63437e+06
M100T31_2	100.112	31.4047	4.80757e+06
M100T69	100.112	69.2834	6.78162e+06
M101T69_1	100.51	69.2834	4.56256e+06
M101T32_1	100.51	32.4171	1.4706e+07
M101T60	100.931	59.9075	1.94245e+06
M101T48	100.931	47.6391	1.35369e+06
M101T69_2	100.931	69.2834	1.78034e+06
M101T32_2	100.957	32.4171	600208
M101T44	101.023	44.1485	3.6824e+06
M101T50_1	101.023	50.041	3.29284e+06
M101T61	101.023	61.1538	5.86769e+06
M101T142	101.024	141.825	3.7561e+07
M101T332	101.023	332.2	4.19135e+06
M101T163	101.023	162.728	1.04605e+07
M101T229	101.023	229.059	1.90687e+07
M101T190	101.024	189.571	1.681e+07
M101T293	101.023	292.623	2.79346e+07
M101T252	101.024	251.555	7.93928e+06
M101T260	101.024	259.74	7.99657e+06
M101T181	101.023	181.154	9.64021e+06
M101T171	101.023	170.665	1.05762e+07
M101T75_1	101.024	74.9588	3.57756e+08
M101T239	101.023	238.605	1.14166e+07
M101T94	101.023	93.7378	2.72888e+07
M101T313	101.024	312.85	4.62202e+06
M101T104	101.023	104.493	7.22185e+07
M101T211	101.024	211.288	6.92033e+07
M101T75_2	101.053	74.9588	1.61921e+07
M101T106	101.06	105.503	4.30634e+07
M101T167	101.06	166.613	4.88702e+07
M101T829	101.071	828.73	3.73396e+07
M101T823	101.071	822.881	4.03895e+07
M101T785	101.071	785.136	2.63267e+07
M101T809	101.071	808.678	8.14314e+07
M101T746	101.071	745.603	2.81911e+07
M101T708	101.071	707.557	1.54575e+07
M101T792	101.071	792.146	2.719e+07
M101T838	101.071	837.524	4.59957e+07
M101T32_3	101.071	32.4171	6.03473e+06
M101T768	101.071	768.166	3.10352e+07
M101T760	101.071	759.605	3.04959e+07
M101T730	101.071	729.798	4.70069e+07
M101T68	101.079	68.0903	1.86789e+06
M101T50_2	101.079	50.041	3.96573e+06
M101T147	101.096	146.742	2.85771e+07
M101T263	101.096	262.529	7.96797e+07
M101T199	101.096	199.43	3.18488e+07
M101T165	101.096	165.217	2.72137e+07
M101T240	101.096	239.913	3.0302e+07
M101T318	101.096	318.497	1.63798e+07
M101T118	101.096	118.116	2.35739e+07
M102T37	101.984	37.1891	1.76079e+06
M102T44	101.984	44.1485	1.82204e+06
M102T35_1	102	34.5397	1.87851e+06
M102T46_1	102.013	46.447	6.76502e+06
M102T230	102.022	230.321	1.11042e+06
M102T75_1	102.021	74.9588	4.08389e+08
M102T211	102.026	211.288	1.37611e+06
M102T725	102.033	725.212	2.70632e+09
M102T644	102.033	643.727	1.79454e+09
M102T353	102.033	352.65	8.26512e+08
M102T663	102.033	663.287	1.93107e+09
M102T540	102.033	539.764	1.35743e+09
M102T411	102.034	410.542	3.12172e+09
M102T497	102.034	497.214	1.63632e+09
M102T794	102.034	793.649	6.56621e+08
M102T626	102.033	626.042	1.95635e+09
M102T516	102.034	516.214	1.39619e+09
M102T830	102.034	830.193	1.30002e+08
M102T688	102.033	687.95	2.66642e+09
M102T807	102.033	807.232	5.95821e+08
M102T770	102.033	769.702	1.63814e+09
M102T636	102.033	636.473	1.51445e+09
M102T509	102.033	508.883	9.81381e+08
M102T698_1	102.033	697.952	1.76564e+09
M102T572	102.034	571.523	2.47974e+09
M102T709	102.033	709.106	2.95613e+09
M102T75_2	102.034	74.9588	4.27992e+08
M102T338	102.034	337.767	4.4182e+08
M102T747	102.033	746.977	2.18268e+09
M102T471	102.033	470.602	5.50723e+09
M102T591	102.033	590.607	2.14503e+09
M102T528	102.034	528.185	1.58004e+09
M102T674_1	102.034	674.402	2.69125e+09
M102T611	102.033	611.145	2.66712e+09
M102T299	102.034	299.493	2.30241e+08
M102T757	102.033	757.001	2.03958e+09
M102T655	102.033	654.542	1.34724e+09
M102T734	102.033	734.269	1.89503e+09
M102T821	102.033	821.334	2.39677e+08
M102T379	102.034	379.194	2.19696e+09
M102T35_2	102.033	34.5397	1.19881e+09
M102T783	102.033	782.558	1.1738e+09
M102T147	102.055	146.742	1.10331e+08
M102T90	102.055	89.6999	1.09938e+09
M102T176	102.055	175.952	8.42544e+07
M102T57	102.063	57.4179	2.72287e+06
M102T46_2	102.067	46.447	415669
M102T698_2	102.067	697.952	3.51389e+06
M102T69	102.063	69.2834	2.04993e+06
M102T674_2	102.067	674.402	6.15403e+06
M102T35_3	102.067	34.5397	2.54409e+06
M102T100	102.091	100.146	3.7952e+07
M102T406	102.091	406.289	3.11037e+07
M102T207	102.102	207.393	7.07926e+07
M102T32	102.128	32.4171	5.06484e+06
M102T438	102.128	437.571	1.16371e+07
M103T456	102.535	456.126	2.96313e+08
M103T772	102.535	772.206	1.17467e+08
M103T588	102.532	587.521	1.47418e+07
M103T663	102.536	663.287	1.2268e+08
M103T794	102.536	793.649	4.53473e+07
M103T496	102.536	495.779	6.23717e+07
M103T721	102.536	720.704	1.61995e+08
M103T626	102.535	626.042	5.05007e+08
M103T74_1	102.536	73.8324	5.60681e+07
M103T399	102.536	399.046	7.93932e+07
M103T813	102.536	812.862	1.87132e+07
M103T535	102.535	535.329	2.98616e+08
M103T804	102.536	804.327	4.37633e+07
M103T688	102.536	687.95	9.71288e+07
M103T388	102.536	387.763	5.51813e+07
M103T698	102.536	697.952	1.37091e+08
M103T572	102.536	571.523	1.67438e+08
M103T709	102.536	709.106	1.60146e+08
M103T509	102.536	508.883	1.28573e+08
M103T747	102.535	746.977	1.70848e+08
M103T487	102.536	486.885	8.34038e+07
M103T674	102.536	674.402	1.5636e+08
M103T757	102.535	757.001	1.3919e+08
M103T734	102.536	734.269	1.44654e+08
M103T301	102.536	300.782	2.09649e+07
M103T35_1	102.535	34.5397	6.90355e+07
M103T783_1	102.536	782.558	8.67131e+07
M103T347	102.536	347.175	8.24948e+07
M103T50	102.97	50.041	7.63072e+07
M103T75	102.97	74.9588	1.65746e+08
M103T708	103.033	707.557	1.01115e+07
M103T639	103.032	639.219	2.81527e+07
M103T601	103.032	601.04	9.77539e+06
M103T570	103.032	570.01	8.09376e+06
M103T694	103.032	693.81	2.10263e+07
M103T35_2	103.032	34.5397	5.89972e+06
M103T264	103.039	264.079	8.08968e+07
M103T165	103.039	165.217	7.70399e+07
M103T97	103.039	96.7698	3.63318e+08
M103T143	103.039	142.85	4.6658e+08
M103T218	103.039	217.866	5.5804e+07
M103T279	103.039	279.039	8.38016e+07
M103T188	103.039	188.126	5.58229e+07
M103T178	103.039	178.408	7.39074e+07
M103T38	103.05	38.3208	7.26574e+06
M103T725	103.05	725.212	1.18818e+07
M103T746	103.05	745.603	8.67077e+06
M103T74_2	103.05	73.8324	8.6959e+07
M103T816	103.05	815.517	8.88241e+06
M103T771	103.05	771.042	9.95031e+06
M103T758	103.05	758.236	1.48942e+07
M103T832	103.05	831.709	1.26788e+07
M103T737	103.05	737.198	7.65967e+06
M103T798	103.05	797.773	1.91214e+07
M103T54	103.05	53.6731	2.15835e+06
M103T783_2	103.05	782.558	1.09061e+07
M103T405	103.053	404.872	1.62306e+06
M103T90	103.058	89.6999	3.80591e+07
M103T393	103.075	392.715	1.92422e+06
M103T206	103.106	205.903	1.48984e+06
M103T76	103.123	76.0874	1.24725e+07
M104T148	103.52	148.117	997169
M104T241	103.538	241.368	7.74619e+06
M104T708	104.03	707.557	3.05847e+07
M104T698	104.03	697.952	3.70407e+07
M104T733	104.03	732.773	4.33315e+07
M104T642	104.03	642.211	5.13808e+07
M104T674	104.03	674.402	6.21327e+07
M104T655	104.03	654.542	2.61578e+07
M104T35	104.03	34.5397	2.67329e+07
M104T783	104.029	782.558	2.16717e+07
M104T101	104.042	101.161	5.44361e+06
M104T96	104.042	95.7572	3.5948e+06
M104T46	104.042	46.447	2.74919e+06
M104T62	104.042	62.1777	1.54538e+06
M104T55	104.042	54.867	1.79725e+06
M104T75	104.049	74.9588	1.13917e+07
M104T649	104.055	649.338	1.24549e+06
M104T345	104.057	344.555	5.83072e+06
M104T393	104.07	392.715	2.56064e+07
M104T91	104.071	90.7088	3.85317e+09
M104T137	104.106	137.373	4.17056e+07
M104T99	104.106	98.9918	5.65095e+08
M104T88	104.107	87.6739	2.10028e+10
M104T838	104.107	837.524	1.42109e+07
M104T32	104.107	32.4171	6.71185e+07
M104T111	104.106	111.382	1.32291e+08
M104T155	104.106	155.197	5.52137e+07
M104T823	104.107	822.881	3.02711e+07
M105T61	105.003	61.1538	6.71328e+06
M105T74	105.003	73.8324	1.19107e+09
M105T52	105.003	52.4521	4.19514e+06
M105T45	105.016	45.3435	1.05827e+06
M105T164	105.018	163.846	1.94157e+06
M105T659	105.018	658.953	2.0018e+07
M105T456	105.033	456.126	2.18283e+06
M105T487	105.033	486.885	7.72908e+06
M105T70	105.033	70.3428	2.36225e+06
M105T767	105.042	766.742	2.33159e+07
M105T669	105.069	668.867	1.50653e+07
M105T649	105.069	649.338	3.13898e+07
M105T682	105.069	681.885	1.10586e+07
M105T789	105.069	789.293	1.25698e+07
M105T562	105.069	561.955	1.0357e+08
M105T718	105.069	717.959	1.16543e+07
M105T703	105.069	703.35	3.22262e+07
M105T545	105.069	545.203	2.75057e+07
M105T694	105.069	693.81	1.49793e+07
M105T384	105.07	383.536	4.16609e+07
M105T802	105.069	801.685	6.92036e+06
M105T91	105.074	90.7088	1.51277e+08
M105T99	105.11	98.9918	2.14021e+07
M105T88	105.11	87.6739	9.82928e+08
M106T31	105.953	31.4047	1.97145e+06
M106T74	106.004	73.8324	1.46079e+08
M106T241	106.041	241.368	1.46724e+07
M106T127	106.05	126.785	2.55236e+07
M106T110	106.05	110.047	1.48016e+07
M106T87	106.049	86.6643	1.5853e+09
M106T91	106.074	90.7088	1.18589e+07
M106T88	106.111	87.6739	4.06039e+07
M107T75	107	74.9588	1.91858e+08
M107T147	107.039	146.742	2.04055e+06
M107T770	107.049	769.702	1.14474e+07
M107T345	107.049	344.555	2.42507e+07
M107T323	107.049	322.536	8.20686e+06
M107T172	107.049	171.935	8.55726e+06
M107T381	107.049	380.63	1.44251e+07
M107T218	107.049	217.866	1.71923e+07
M107T543	107.049	542.766	6.83345e+06
M107T744	107.049	744.182	1.21487e+07
M107T368	107.049	367.949	9.75579e+06
M107T241	107.058	241.368	1.91178e+06
M107T87	107.053	86.6643	4.29086e+07
M107T252	107.06	251.555	927837
M107T582	107.07	581.625	3.54564e+06
M107T39	107.07	39.4128	8.0882e+06
M107T210	107.07	210.186	2.28599e+06
M107T436	107.085	436.069	1.66916e+07
M107T669	107.084	668.867	2.30884e+07
M107T649	107.085	649.338	2.79148e+07
M107T451	107.085	450.503	1.51129e+07
M107T682	107.085	681.885	1.72634e+07
M107T702	107.085	702.055	4.95099e+07
M107T562	107.085	561.955	1.02691e+08
M107T545	107.085	545.203	3.6254e+07
M108T121	107.504	120.525	6.1574e+06
M108T113	107.504	112.781	4.45126e+06
M108T233	107.599	233.081	1.36364e+06
M108T69	107.95	69.2834	2.31064e+06
M108T63	107.95	63.4448	4.81372e+06
M108T48	107.95	47.6391	2.50674e+06
M108T55	107.95	54.867	4.46685e+06
M108T788	108.022	787.856	1.36189e+08
M108T834	108.022	834.486	2.13806e+07
M108T760	108.022	759.605	1.93977e+08
M108T820	108.022	819.78	7.29091e+07
M108T803	108.022	802.88	7.20197e+07
M108T35	108.022	34.5397	1.45963e+07
M108T435	108.044	434.589	1.11915e+07
M108T106	108.044	105.503	1.5492e+08
M108T465	108.044	464.668	1.23962e+07
M108T133	108.044	133.259	7.57813e+07
M108T384	108.043	383.536	3.41331e+07
M109T139	108.512	138.766	851650
M109T211	108.512	211.288	6.45514e+06
M109T794_1	108.523	793.649	1.17466e+07
M109T757	108.523	757.001	8.00829e+06
M109T35	108.523	34.5397	1.58111e+06
M109T783_1	108.523	782.558	8.51967e+06
M109T82	108.948	82.0569	4.07073e+06
M109T74	108.961	73.8324	7.1424e+06
M109T54	108.958	53.6731	3.59093e+06
M109T746	109.022	745.603	2.4057e+08
M109T794_2	109.022	793.649	5.65554e+07
M109T33	109.022	33.467	1.13115e+08
M109T830_1	109.022	830.193	2.71598e+07
M109T807	109.022	807.232	8.39189e+07
M109T698	109.022	697.952	7.49776e+07
M109T69	109.022	69.2834	3.6291e+06
M109T690	109.022	689.5	7.58135e+07
M109T760	109.022	759.605	1.82865e+08
M109T821	109.022	821.334	3.27892e+07
M109T713	109.022	713.464	1.64764e+08
M109T772_1	109.022	772.206	1.26135e+08
M109T677	109.022	677.376	7.65417e+07
M109T730	109.022	729.798	3.69123e+08
M109T783_2	109.023	782.558	1.13769e+08
M109T101	109.028	101.161	2.82591e+08
M109T107	109.028	106.513	2.62955e+08
M109T163	109.028	162.728	1.74763e+08
M109T293	109.028	292.623	1.42587e+08
M109T181	109.028	181.154	8.67624e+07
M109T652	109.028	651.956	9.82823e+07
M109T659	109.028	658.953	7.75168e+07
M109T94	109.028	93.7378	3.41123e+08
M109T188	109.028	188.126	1.00635e+08
M109T143	109.028	142.85	1.65055e+08
M109T121	109.028	120.525	1.48681e+08
M109T239	109.028	238.605	5.30146e+07
M109T559	109.028	559.459	9.97882e+06
M109T359	109.028	359.32	5.72717e+08
M109T443	109.028	443.256	6.83553e+07
M109T209	109.028	208.905	7.06028e+07
M109T426	109.028	425.909	6.61122e+07
M109T36	109.041	35.8675	3.40518e+06
M109T44_1	109.041	44.1485	1.34163e+06
M109T382	109.047	382.125	1.16606e+06
M109T37	109.065	37.1891	3.44316e+06
M109T44_2	109.065	44.1485	3.82934e+06
M109T598	109.065	598.125	1.05783e+07
M109T51	109.065	51.1942	6.35055e+06
M109T543	109.064	542.766	1.44041e+07
M109T67	109.065	66.9841	2.02095e+06
M109T144	109.076	143.959	1.34726e+07
M109T158	109.076	157.773	9.27574e+06
M109T98	109.076	97.7824	1.31249e+07
M109T109	109.076	108.698	8.65026e+06
M109T791	109.1	790.802	3.9452e+07
M109T522	109.101	522.177	3.77752e+07
M109T605	109.1	605.264	2.38708e+07
M109T649	109.101	649.338	1.95784e+08
M109T660	109.101	660.455	7.34634e+07
M109T682	109.1	681.885	5.99564e+07
M109T830_2	109.1	830.193	2.28523e+07
M109T670	109.1	670.166	6.78329e+07
M109T562	109.101	561.955	5.39762e+08
M109T816	109.1	815.517	3.1832e+07
M109T692	109.1	692.461	5.84071e+07
M109T620	109.1	620.172	2.92926e+07
M109T719	109.1	719.215	7.64045e+07
M109T751	109.1	751.333	2.94393e+07
M109T703	109.101	703.35	2.1521e+08
M109T545	109.101	545.203	2.33355e+08
M109T632	109.1	631.982	4.14611e+07
M109T800	109.1	800.484	1.92029e+07
M109T741	109.1	741.302	3.24442e+07
M109T576	109.1	575.878	4.61663e+07
M109T772_2	109.1	772.206	3.35066e+07
M109T588	109.1	587.521	3.40313e+07
M110T663_1	109.523	663.287	1.89625e+07
M110T794_1	109.521	793.649	1.22519e+08
M110T33_1	109.521	33.467	2.51672e+08
M110T644	109.521	643.727	4.46816e+07
M110T806	109.521	805.823	1.63853e+08
M110T756	109.521	755.537	6.47905e+08
M110T827	109.521	827.271	1.58691e+08
M110T783_1	109.521	782.558	1.63505e+08
M110T691	109.523	691.022	7.36518e+07
M110T32	109.982	32.4171	3.25988e+06
M110T39	110.008	39.4128	2.34689e+06
M110T75	110.008	74.9588	4.07952e+09
M110T49	110.008	48.7362	3.02505e+07
M110T69	110.019	69.2834	7.50688e+07
M110T33_2	110.02	33.467	1.86659e+09
M110T600	110.019	599.621	6.77219e+08
M110T579	110.019	578.816	4.32322e+08
M110T829	110.019	828.73	4.90994e+08
M110T663_2	110.019	663.287	8.10589e+08
M110T540	110.019	539.764	3.80044e+08
M110T794_2	110.019	793.649	8.97458e+08
M110T626	110.019	626.042	7.62161e+08
M110T688	110.019	687.95	1.28293e+09
M110T388	110.019	387.763	4.59911e+08
M110T731	110.019	731.347	1.63193e+10
M110T642	110.019	642.211	1.01842e+09
M110T570	110.019	570.01	4.27905e+08
M110T820	110.019	819.78	7.46448e+08
M110T551	110.019	550.919	5.14817e+08
M110T611	110.019	611.145	8.77906e+08
M110T655	110.019	654.542	5.39673e+08
M110T402	110.019	401.963	5.35791e+08
M110T589	110.019	589.053	5.68124e+08
M110T783_2	110.019	782.558	1.78987e+09
M110T804	110.021	804.327	1.20893e+09
M110T677	110.02	677.376	5.59705e+08
M110T293	110.031	292.623	7.36551e+06
M110T95	110.031	94.7467	1.99099e+07
M110T359	110.031	359.32	3.32557e+07
M110T426	110.031	425.909	3.25523e+06
M110T104_1	110.031	104.493	2.63731e+07
M110T743	110.057	742.68	2.75285e+06
M110T751	110.057	751.333	5.50921e+06
M110T760	110.057	759.605	3.27529e+06
M110T734	110.057	734.269	3.87241e+06
M110T147	110.059	146.742	3.48833e+08
M110T183	110.059	182.574	9.31357e+07
M110T241	110.059	241.368	5.41558e+07
M110T165	110.059	165.217	2.01944e+08
M110T389	110.059	389.035	2.2054e+07
M110T510	110.059	510.333	1.94394e+08
M110T197	110.059	196.644	6.57666e+07
M110T530	110.059	529.713	1.51919e+08
M110T156	110.059	156.393	5.65786e+08
M110T104_2	110.06	104.493	8.92983e+07
M110T84	110.071	83.5661	5.30504e+06
M110T207	110.071	207.393	4.7416e+07
M110T649	110.104	649.338	1.66672e+07
M110T660	110.104	660.455	5.83127e+06
M110T682	110.104	681.885	4.21017e+06
M110T670	110.104	670.166	5.05793e+06
M110T562	110.104	561.955	4.66422e+07
M110T718	110.104	717.959	5.70746e+06
M110T703	110.104	703.35	1.52136e+07
M110T545	110.104	545.203	1.8304e+07
M110T694	110.104	693.81	4.16837e+06
M110T576	110.104	575.878	3.44459e+06
M111T829_1	110.522	828.73	5.38921e+07
M111T663_1	110.522	663.287	6.73376e+07
M111T33_1	110.521	33.467	1.36246e+08
M111T644	110.522	643.727	7.95766e+07
M111T806	110.522	805.823	9.39247e+07
M111T688_1	110.522	687.95	1.34973e+08
M111T795_1	110.522	795.165	7.27351e+07
M111T698_1	110.521	697.952	9.52718e+07
M111T733	110.522	732.773	1.50028e+08
M111T818	110.522	818.418	5.56583e+07
M111T69	110.521	69.2834	4.78926e+06
M111T747	110.522	746.977	3.12567e+08
M111T760	110.522	759.605	2.3499e+08
M111T674	110.522	674.402	9.1777e+07
M111T655	110.522	654.542	4.10402e+07
M111T713	110.522	713.464	2.54715e+08
M111T772	110.522	772.206	1.93936e+08
M111T783_1	110.522	782.558	1.51211e+08
M111T60	111.009	59.9075	2.28316e+06
M111T163	111.007	162.728	1.5756e+08
M111T74	111.009	73.8324	4.83517e+08
M111T252	111.008	251.555	2.93844e+06
M111T725	111.019	725.212	1.54851e+09
M111T809	111.02	808.678	1.30022e+09
M111T746	111.019	745.603	1.44558e+09
M111T794_1	111.02	793.649	1.52415e+09
M111T33_2	111.02	33.467	5.14307e+08
M111T688_2	111.019	687.95	3.35e+08
M111T698_2	111.02	697.952	3.76548e+08
M111T768	111.02	768.166	1.99518e+09
M111T757	111.02	757.001	1.5375e+09
M111T826	111.019	825.74	2.15877e+09
M111T783_2	111.02	782.558	1.83355e+09
M111T557	111.039	556.816	2.24372e+08
M111T829_2	111.039	828.73	3.48605e+07
M111T36	111.039	35.8675	3.26554e+08
M111T663_2	111.038	663.287	5.69284e+08
M111T540	111.039	539.764	3.4805e+08
M111T794_2	111.038	793.649	2.07846e+08
M111T496	111.039	495.779	3.54929e+08
M111T367	111.039	366.514	2.91664e+08
M111T430	111.039	430.131	2.08233e+08
M111T804	111.038	804.327	1.07225e+08
M111T388	111.039	387.763	4.00856e+08
M111T531	111.039	531.127	4.88486e+08
M111T345	111.039	344.555	1.68596e+08
M111T676	111.038	675.866	5.56606e+08
M111T515	111.039	514.727	4.38639e+08
M111T507	111.039	507.343	3.48393e+08
M111T75	111.038	74.9588	1.53717e+08
M111T549	111.039	549.375	3.13042e+08
M111T719	111.038	719.215	5.0017e+08
M111T758	111.038	758.236	8.69691e+08
M111T468	111.038	467.706	5.3044e+08
M111T625	111.038	624.608	2.90555e+09
M111T568	111.038	568.464	4.07797e+08
M111T487	111.038	486.885	3.4291e+08
M111T695	111.038	695.155	8.35041e+08
M111T820_1	111.038	819.78	6.35449e+07
M111T402	111.038	401.963	5.76366e+08
M111T448	111.039	447.531	2.26596e+08
M111T783_3	111.038	782.558	2.38751e+08
M111T306	111.044	306.247	5.11965e+07
M111T143	111.043	142.85	5.82988e+07
M111T92_1	111.044	91.7174	8.13302e+07
M111T276	111.044	276.414	8.81556e+07
M111T107	111.044	106.513	1.33136e+08
M111T185	111.055	185.398	1.69028e+07
M111T103	111.055	103.423	2.21389e+07
M111T92_2	111.055	91.7174	2.67642e+07
M111T510	111.063	510.333	1.22308e+07
M111T530	111.063	529.713	8.95727e+06
M111T240	111.063	239.913	3.17535e+06
M111T156	111.063	156.393	6.41314e+07
M111T544	111.08	544.056	1.81148e+07
M111T562	111.079	561.955	2.24826e+07
M111T311	111.091	311.445	8.28065e+06
M111T807	111.092	807.232	1.66674e+07
M111T795_2	111.092	795.165	7.63893e+06
M111T838	111.091	837.524	2.26158e+07
M111T820_2	111.092	819.78	1.71564e+07
M111T298	111.091	298.135	6.85275e+06
M112T698_1	111.518	697.952	1.464e+07
M112T794_1	111.522	793.649	6.22595e+08
M112T33_1	111.522	33.467	4.3136e+07
M112T728	111.522	728.25	1.44412e+08
M112T758_1	111.522	758.236	1.2125e+08
M112T65	111.522	64.6213	5.40767e+06
M112T456	111.541	456.126	3.46963e+07
M112T725	111.541	725.212	7.24595e+07
M112T644	111.541	643.727	3.33962e+07
M112T540	111.541	539.764	2.80687e+07
M112T432_1	111.541	431.64	3.11431e+07
M112T626	111.541	626.042	5.00073e+07
M112T748	111.541	748.486	5.43716e+07
M112T666	111.541	666.137	4.57984e+07
M112T789	111.541	789.293	2.9065e+07
M112T770	111.541	769.702	2.72478e+07
M112T636	111.541	636.473	3.22157e+07
M112T531	111.541	531.127	2.79783e+07
M112T73	111.54	72.6708	6.29958e+06
M112T676	111.541	675.866	4.61611e+07
M112T709	111.541	709.106	4.22898e+07
M112T695	111.541	695.155	6.62315e+07
M112T403	111.541	403.447	5.55442e+07
M112T365	111.541	365.061	2.27437e+07
M112T655	111.54	654.542	3.95561e+07
M112T588	111.54	587.521	1.41325e+08
M112T35	111.54	34.5397	1.97573e+07
M112T327	111.541	326.78	1.65286e+07
M112T320	111.589	319.758	8.92457e+06
M112T225	111.968	224.729	6.54967e+06
M112T31	111.968	31.4047	7.88989e+06
M112T192	111.968	192.437	3.83473e+06
M112T70	111.968	70.3428	9.39252e+06
M112T60_1	111.984	59.9075	1.05547e+06
M112T36	111.984	35.8675	6.15039e+06
M112T67	111.984	66.9841	703588
M112T60_2	112.006	59.9075	2.37964e+06
M112T75	112.006	74.9588	5.18428e+08
M112T51	112.006	51.1942	887616
M112T164	112.011	163.846	7.03052e+06
M112T746	112.017	745.603	6.96618e+08
M112T727	112.017	726.707	6.46215e+08
M112T794_2	112.017	793.649	6.00147e+08
M112T33_2	112.017	33.467	2.12193e+08
M112T807	112.017	807.232	9.11598e+08
M112T824	112.017	824.311	8.81686e+08
M112T698_2	112.018	697.952	1.49713e+08
M112T712	112.018	711.984	3.03639e+08
M112T758_2	112.017	758.236	5.49568e+08
M112T768	112.017	768.166	4.9518e+08
M112T783	112.017	782.558	6.25779e+08
M112T161	112.039	161.494	1.417e+08
M112T271	112.038	270.983	4.40753e+07
M112T106_1	112.039	105.503	8.7852e+07
M112T169	112.039	169.221	1.66929e+08
M112T393	112.038	392.715	3.09003e+07
M112T446_1	112.038	445.984	2.02179e+07
M112T177	112.039	177.295	1.30279e+08
M112T260	112.05	259.74	2.17659e+07
M112T143_1	112.05	142.85	7.10646e+07
M112T121	112.05	120.525	1.35679e+07
M112T374	112.047	373.532	2.93803e+06
M112T338	112.047	337.767	4.30051e+06
M112T93	112.05	92.7272	6.93789e+07
M112T106_2	112.05	105.503	2.91824e+08
M112T432_2	112.075	431.64	2.24573e+07
M112T544	112.075	544.056	1.72375e+07
M112T446_2	112.075	445.984	1.92366e+07
M112T328	112.075	328.106	2.40313e+07
M112T394	112.075	393.934	1.83452e+07
M112T185	112.086	185.398	3.64874e+07
M112T283	112.086	282.886	2.91259e+07
M112T246	112.087	246.372	1.19874e+09
M112T108	112.086	107.537	5.77069e+08
M112T143_2	112.086	142.85	1.60183e+08
M112T209	112.087	208.905	2.5322e+08
M112T124	112.086	124.487	1.78923e+08
M112T222	112.086	222.017	6.20006e+07
M112T68	112.112	68.0903	4.67339e+06
M112T49	112.12	48.7362	3.94775e+06
M112T156	112.12	156.393	1.11243e+06
M112T245	112.125	245.199	1.10203e+06
M113T788	112.516	787.856	3.409e+07
M113T838	112.517	837.524	6.55741e+06
M113T821_1	112.517	821.334	1.62675e+07
M113T772	112.517	772.206	1.50858e+07
M113T33	112.519	33.467	1.83551e+07
M113T237	112.538	237.171	3.83815e+06
M113T201	112.579	200.766	3.9982e+06
M113T222	112.588	222.017	2.27012e+06
M113T81	112.895	80.824	1.31418e+07
M113T45	112.966	45.3435	7.4288e+06
M113T51	112.966	51.1942	4.49156e+06
M113T59	112.966	58.6151	3.59463e+06
M113T31	112.967	31.4047	1.88299e+07
M113T75	112.966	74.9588	2.75997e+07
M113T206_1	112.995	205.903	1.71561e+06
M113T829	113.016	828.73	9.88118e+07
M113T794	113.016	793.649	1.00534e+08
M113T806	113.016	805.823	1.25898e+08
M113T768	113.017	768.166	1.66175e+08
M113T737	113.016	737.198	1.93442e+08
M113T783	113.016	782.558	5.73379e+07
M113T38	113.022	38.3208	1.49818e+08
M113T309	113.023	308.967	6.22041e+07
M113T96	113.023	95.7572	1.70852e+08
M113T266	113.022	265.624	1.46196e+08
M113T579	113.034	578.816	4.58234e+07
M113T369	113.034	369.321	5.29659e+07
M113T557	113.034	556.816	3.91922e+07
M113T206_2	113.035	205.903	1.04622e+09
M113T435	113.034	434.589	4.20073e+07
M113T159	113.034	159.017	1.21638e+08
M113T144	113.034	143.959	1.86363e+08
M113T348	113.034	348.488	4.06215e+07
M113T810	113.034	810.052	3.41121e+07
M113T605	113.034	605.264	4.17426e+07
M113T181	113.034	181.154	6.98771e+07
M113T462	113.034	461.845	9.86858e+07
M113T660	113.034	660.455	4.84406e+07
M113T167	113.034	166.613	5.36241e+07
M113T398	113.034	397.878	6.00096e+07
M113T419	113.034	418.97	5.09746e+07
M113T642	113.034	642.211	3.6164e+07
M113T286	113.034	285.9	8.53564e+07
M113T623	113.034	623.11	4.79721e+07
M113T491	113.034	491.373	3.82572e+07
M113T188	113.034	188.126	1.19192e+08
M113T676	113.034	675.866	1.29125e+08
M113T446	113.034	445.984	4.42891e+07
M113T834	113.034	834.486	5.24114e+07
M113T533	113.034	532.526	4.65768e+07
M113T706	113.034	706.229	4.69036e+07
M113T547	113.034	546.651	4.76563e+07
M113T484	113.034	483.973	3.22726e+07
M113T341	113.034	340.548	4.89244e+07
M113T331	113.034	330.809	5.93479e+07
M113T635	113.034	635.022	3.76726e+07
M113T512	113.034	511.77	4.11157e+07
M113T131	113.035	130.668	1.59381e+08
M113T716	113.034	716.403	4.3777e+07
M113T382	113.034	382.125	5.0473e+07
M113T652	113.034	651.956	3.49884e+07
M113T298	113.034	298.135	8.3044e+07
M113T236	113.034	235.734	2.3212e+08
M113T358	113.034	357.958	5.31585e+07
M113T595	113.034	595.066	6.20631e+07
M113T802	113.034	801.685	3.90394e+07
M113T821_2	113.034	821.334	4.23912e+07
M113T276	113.034	276.414	6.36316e+07
M113T502	113.034	501.549	4.63983e+07
M113T761	113.035	760.916	1.83966e+08
M113T567	113.034	567.1	4.35261e+07
M113T308	113.034	307.735	4.83894e+07
M113T267	113.034	267.171	1.06399e+08
M113T792	113.034	792.146	4.04446e+07
M113T254	113.034	254.446	6.67523e+07
M113T177	113.059	177.295	3.94121e+07
M113T425	113.059	424.572	2.44586e+07
M113T359	113.059	359.32	1.47014e+07
M113T784	113.059	783.78	1.06964e+08
M113T335	113.07	334.966	1.88883e+07
M113T232	113.07	231.773	7.00678e+07
M113T92	113.07	91.7174	2.14295e+08
M113T206_3	113.074	205.903	762493
M113T246	113.09	246.372	6.24922e+07
M113T108	113.09	107.537	2.26793e+07
M114T78	113.964	78.3841	7.75114e+07
M114T137	113.963	137.373	6.78604e+07
M114T31	113.963	31.4047	1.09402e+08
M114T171	113.963	170.665	3.16728e+07
M114T87	113.963	86.6643	9.14591e+06
M114T70	113.963	70.3428	1.48068e+08
M114T148	113.963	148.117	6.54381e+07
M114T45	113.963	45.3435	2.47644e+08
M114T748	114.016	748.486	1.71909e+07
M114T830_1	114.016	830.193	1.31902e+07
M114T804	114.016	804.327	3.08048e+07
M114T771	114.016	771.042	2.17966e+07
M114T731	114.015	731.347	1.65452e+07
M114T760	114.016	759.605	2.60731e+07
M114T784	114.016	783.78	4.18091e+07
M114T821_1	114.016	821.334	1.84781e+07
M114T38	114.026	38.3208	1.18854e+07
M114T309	114.026	308.967	2.21035e+06
M114T62_1	114.025	62.1777	5.9156e+06
M114T68	114.038	68.0903	2.20279e+06
M114T206	114.037	205.903	4.09049e+07
M114T144	114.037	143.959	6.87351e+06
M114T55	114.038	54.867	2.60155e+06
M114T39	114.038	39.4128	2.29105e+06
M114T106	114.055	105.503	1.2437e+08
M114T92	114.055	91.7174	2.08389e+08
M114T178	114.054	178.408	1.17418e+08
M114T69	114.063	69.2834	498974
M114T62_2	114.063	62.1777	604798
M114T52	114.063	52.4521	1.06446e+06
M114T104	114.066	104.493	7.6702e+06
M114T91	114.074	90.7088	1.06077e+07
M114T694	114.091	693.81	1.12846e+08
M114T699	114.091	699.389	1.15883e+08
M114T628	114.091	627.58	1.15675e+08
M114T633	114.091	633.476	9.77232e+07
M114T456	114.091	456.126	4.94025e+07
M114T662	114.091	661.979	1.47741e+08
M114T791	114.091	790.802	1.44685e+08
M114T435	114.092	434.589	1.41364e+08
M114T830_2	114.091	830.193	1.07246e+08
M114T644	114.091	643.727	1.5012e+08
M114T475	114.091	475.007	5.83412e+07
M114T604	114.091	603.95	2.15719e+08
M114T535	114.091	535.329	1.24843e+08
M114T524	114.091	523.735	4.62123e+07
M114T676	114.091	675.866	1.61293e+08
M114T807	114.091	807.232	1.19878e+08
M114T838	114.091	837.524	6.27382e+07
M114T620	114.091	620.172	1.32867e+08
M114T683	114.091	683.436	7.79828e+07
M114T515	114.091	514.727	5.06669e+07
M114T577	114.091	577.366	3.08022e+08
M114T611	114.091	611.145	1.07903e+08
M114T507	114.091	507.343	4.09128e+07
M114T765	114.091	765.406	3.48935e+08
M114T736	114.091	735.7	2.51653e+08
M114T491	114.091	491.373	8.50617e+07
M114T653	114.092	653.147	1.03708e+08
M114T466	114.091	466.162	5.54708e+07
M114T551	114.091	550.919	1.07421e+08
M114T423	114.091	423.199	1.03489e+08
M114T715	114.091	715.011	2.84988e+08
M114T821_2	114.091	821.334	1.04293e+08
M114T406	114.092	406.289	1.60927e+08
M114T253	114.102	253.024	7.71472e+07
M114T77	114.102	77.2391	2.01023e+08
M114T216	114.102	216.359	4.78722e+07
M115T725	114.558	725.212	2.60831e+07
M115T794	114.558	793.649	1.58698e+07
M115T713	114.558	713.464	2.37213e+07
M115T772	114.558	772.206	2.15791e+07
M115T783	114.558	782.558	1.95093e+07
M115T68	114.971	68.0903	2.7347e+06
M115T62	114.971	62.1777	2.81641e+06
M115T55	114.971	54.867	2.88337e+06
M115T49	114.971	48.7362	2.98948e+06
M115T33	115.015	33.467	2.18756e+06
M115T59	115.028	58.6151	1.72399e+06
M115T629	115.034	629.015	871420
M115T158	115.039	157.773	9.33312e+07
M115T293_1	115.038	292.623	1.17839e+08
M115T180	115.038	179.75	7.92448e+07
M115T207	115.039	207.393	1.00755e+08
M115T86	115.038	85.6453	2.8582e+07
M115T143	115.039	142.85	1.4187e+08
M115T323	115.039	322.536	1.31638e+08
M115T77_1	115.038	77.2391	3.12782e+07
M115T94	115.038	93.7378	1.37304e+08
M115T545	115.038	545.203	3.51066e+07
M115T104	115.039	104.493	3.00829e+08
M115T187	115.05	186.709	8.13481e+06
M115T38	115.05	38.3208	5.12911e+06
M115T173	115.05	173.407	1.21007e+07
M115T241	115.046	241.368	2.45366e+07
M115T52	115.05	52.4521	5.06765e+06
M115T66_1	115.05	65.7101	5.8731e+06
M115T145_1	115.05	145.382	2.04006e+07
M115T88	115.05	87.6739	1.18722e+07
M115T223	115.074	223.474	2.7857e+07
M115T554	115.074	553.936	2.70964e+06
M115T250	115.074	250.144	1.20488e+07
M115T145_2	115.074	145.382	2.3057e+07
M115T169	115.074	169.221	1.06489e+07
M115T258	115.074	258.489	7.47142e+06
M115T268	115.074	268.427	1.03977e+07
M115T240	115.074	239.913	1.0144e+07
M115T276	115.074	276.414	4.26913e+07
M115T379_1	115.074	379.194	8.5495e+06
M115T202	115.086	202.149	2.80643e+07
M115T367	115.086	366.514	5.86049e+06
M115T93	115.086	92.7272	4.50633e+08
M115T379_2	115.086	379.194	4.31869e+06
M115T435	115.094	434.589	8.63232e+06
M115T644	115.094	643.727	1.08183e+07
M115T572	115.094	571.523	1.05955e+07
M115T672	115.094	671.649	8.45719e+06
M115T685	115.094	684.985	1.21346e+07
M115T655	115.094	654.542	8.74489e+06
M115T697	115.094	696.575	7.37787e+06
M115T54	115.094	53.6731	2.17697e+07
M115T101	115.111	101.161	5.27937e+07
M115T293_2	115.111	292.623	1.04872e+08
M115T271	115.111	270.983	8.14197e+07
M115T31	115.111	31.4047	1.73166e+07
M115T77_2	115.111	77.2391	4.78299e+07
M115T239	115.111	238.605	9.66763e+07
M115T89	115.111	88.6838	3.97245e+07
M115T198	115.111	198.072	8.15244e+07
M115T66_2	115.111	65.7101	1.07912e+08
M115T261	115.111	261.177	1.06514e+08
M115T148	115.111	148.117	1.25083e+08
M115T44	115.111	44.1485	6.65643e+07
M116T274	115.529	273.531	392067
M116T241	115.548	241.368	1.55817e+06
M116T673	115.557	672.956	1.89062e+06
M116T31	115.964	31.4047	7.47394e+06
M116T69	115.969	69.2834	2.40357e+06
M116T62	115.969	62.1777	2.21393e+06
M116T52	115.969	52.4521	3.62298e+06
M116T42	116.001	41.798	5.31873e+07
M116T87	116.034	86.6643	2.10332e+08
M116T148	116.034	148.117	1.51903e+08
M116T38	116.042	38.3208	2.30094e+06
M116T57	116.042	57.4179	3.58612e+06
M116T46	116.042	46.447	2.67063e+06
M116T321	116.042	321.198	6.39284e+06
M116T67	116.042	66.9841	2.34433e+06
M116T456	116.071	456.126	3.35539e+07
M116T540	116.071	539.764	3.60828e+07
M116T311	116.07	311.445	1.11818e+08
M116T809	116.069	808.678	3.58308e+07
M116T746	116.07	745.603	5.48917e+07
M116T582	116.071	581.625	1.56528e+08
M116T401	116.07	400.59	4.13921e+07
M116T78	116.07	78.3841	2.12953e+08
M116T706	116.07	706.229	3.24134e+07
M116T794	116.07	793.649	3.72707e+07
M116T692	116.07	692.461	3.26949e+07
M116T205	116.07	204.747	6.82669e+07
M116T86	116.07	85.6453	2.15221e+08
M116T158	116.071	157.773	4.59666e+08
M116T558	116.071	557.967	3.8818e+07
M116T547	116.07	546.651	2.7455e+07
M116T394	116.07	393.934	2.63894e+07
M116T225	116.07	224.729	6.39698e+07
M116T764	116.07	763.856	7.28203e+07
M116T699	116.071	699.389	2.61529e+07
M116T430	116.071	430.131	4.22742e+07
M116T660	116.071	660.455	5.99381e+07
M116T98_1	116.071	97.7824	1.00526e+10
M116T670	116.07	670.166	3.57626e+07
M116T647	116.07	646.794	3.84361e+07
M116T685	116.071	684.985	4.0853e+07
M116T335	116.071	334.966	4.96401e+07
M116T267	116.07	267.171	4.13765e+07
M116T243	116.071	242.682	5.74406e+07
M116T724	116.071	723.682	4.62308e+07
M116T833	116.07	833.029	3.6727e+07
M116T418	116.071	417.676	7.2463e+07
M116T620	116.071	620.172	3.65443e+07
M116T677	116.071	677.376	2.81988e+07
M116T446	116.071	445.984	5.63855e+07
M116T275	116.071	274.968	3.45356e+07
M116T515	116.071	514.727	5.40566e+07
M116T713	116.071	713.464	4.12109e+07
M116T504	116.071	504.466	4.09701e+07
M116T737	116.07	737.198	4.46183e+07
M116T482	116.071	482.436	3.78538e+07
M116T257	116.069	257.155	4.77964e+07
M116T530_1	116.071	529.713	4.38812e+07
M116T632	116.07	631.982	5.30024e+07
M116T611	116.07	611.145	4.17794e+07
M116T466	116.071	466.162	3.68121e+07
M116T298	116.07	298.135	5.49106e+07
M116T216	116.071	216.359	4.79605e+07
M116T188	116.07	188.126	9.07042e+07
M116T365	116.071	365.061	1.00952e+08
M116T32	116.107	32.4171	3.49947e+06
M116T530_2	116.107	529.713	1.66693e+07
M116T98_2	116.112	97.7824	7.35148e+06
M116T355	116.118	355.41	4.06751e+06
M117T122	116.51	122.007	2.75765e+07
M117T136	116.51	135.971	7.02848e+06
M117T113	116.51	112.781	1.94431e+07
M117T809	116.523	808.678	1.89814e+07
M117T36	116.524	35.8675	7.26101e+06
M117T758	116.524	758.236	1.08802e+08
M117T821	116.523	821.334	7.29322e+06
M117T781	116.523	781.303	2.78119e+07
M117T792	116.523	792.146	3.23073e+07
M117T137	116.966	137.373	1.72889e+07
M117T62	116.966	62.1777	9.05237e+07
M117T116	117.011	115.522	1.01706e+06
M117T33	117.027	33.467	1.09115e+07
M117T148	117.037	148.117	5.37885e+06
M117T147	117.054	146.742	3.80891e+08
M117T199	117.054	199.43	9.09259e+07
M117T96	117.053	95.7572	5.23723e+08
M117T342	117.054	341.802	2.30907e+07
M117T66	117.054	65.7101	8.70627e+07
M117T562	117.069	561.955	4.84389e+06
M117T777	117.069	777.245	3.48273e+07
M117T311	117.074	311.445	5.30206e+06
M117T98	117.074	97.7824	4.82216e+08
M117T43	117.073	43.0471	1.77054e+06
M117T438	117.102	437.571	2.18352e+06
M117T31	117.138	31.4047	6.6138e+06
M118T211	117.517	211.288	6.14947e+06
M118T36	117.934	35.8675	2.58644e+06
M118T55	117.934	54.867	4.6386e+06
M118T67	117.934	66.9841	2.77641e+06
M118T45	117.934	45.3435	4.42021e+06
M118T69	117.959	69.2834	2.99214e+06
M118T35	117.959	34.5397	1.45091e+07
M118T61	118.035	61.1538	4.60895e+06
M118T51	118.035	51.1942	3.02103e+06
M118T44	118.035	44.1485	1.89717e+06
M118T75	118.035	74.9588	6.07774e+08
M118T38	118.047	38.3208	5.70486e+06
M118T66	118.049	65.7101	6.48636e+06
M118T101	118.058	101.161	7.03123e+06
M118T96	118.057	95.7572	1.08235e+07
M118T791_1	118.065	790.802	7.87022e+06
M118T605	118.065	605.264	6.31492e+06
M118T669	118.065	668.867	7.93174e+06
M118T649	118.064	649.338	1.42056e+07
M118T660_1	118.065	660.455	7.09849e+06
M118T682	118.065	681.885	9.43127e+06
M118T584	118.065	584.417	6.98668e+06
M118T345_1	118.065	344.555	1.34151e+07
M118T544	118.064	544.056	1.68396e+07
M118T562	118.064	561.955	3.56273e+07
M118T718	118.065	717.959	9.74861e+06
M118T703	118.065	703.35	1.713e+07
M118T753	118.065	752.541	6.72975e+06
M118T216	118.065	216.359	3.35907e+06
M118T800	118.065	800.484	1.06524e+07
M118T402	118.065	401.963	1.65649e+07
M118T668	118.086	667.609	2.68939e+07
M118T791_2	118.085	790.802	4.2188e+07
M118T809	118.086	808.678	1.01794e+08
M118T660_2	118.086	660.455	3.84173e+07
M118T229	118.086	229.059	4.41002e+07
M118T158	118.086	157.773	1.43898e+08
M118T644	118.085	643.727	4.72534e+07
M118T474	118.085	473.597	2.95734e+07
M118T408	118.086	407.724	3.44101e+07
M118T180	118.086	179.75	5.58584e+07
M118T430	118.086	430.131	5.29118e+07
M118T674	118.086	674.402	4.17516e+07
M118T401	118.086	400.59	2.94915e+07
M118T167	118.085	166.613	7.70916e+07
M118T448	118.086	447.531	2.49536e+07
M118T440	118.086	440.459	3.36627e+07
M118T282	118.085	281.666	8.30029e+07
M118T243	118.085	242.682	3.81637e+07
M118T734	118.086	734.269	4.06185e+07
M118T345_2	118.085	344.555	8.46168e+07
M118T741	118.085	741.302	3.81354e+07
M118T455	118.086	454.739	4.02051e+07
M118T418	118.086	417.676	3.99325e+07
M118T653	118.086	653.147	2.61217e+07
M118T139	118.086	138.766	1.04669e+09
M118T506	118.086	505.855	1.63455e+08
M118T712	118.086	711.984	4.04244e+07
M118T631	118.086	630.507	5.10831e+07
M118T110	118.086	110.047	2.77797e+09
M118T466	118.085	466.162	3.88293e+07
M118T123	118.086	123.262	1.56917e+09
M118T771	118.086	771.042	3.43036e+07
M118T197	118.086	196.644	4.66112e+07
M118T607	118.086	606.774	1.17302e+08
M118T218	118.086	217.866	5.77945e+07
M118T568	118.086	568.464	5.74646e+07
M118T586	118.086	585.968	3.77334e+07
M118T695	118.086	695.155	8.114e+07
M118T760	118.085	759.605	7.27584e+07
M118T188	118.086	188.126	4.14412e+07
M118T545	118.086	545.203	1.03328e+08
M118T92	118.085	91.7174	2.95049e+09
M118T316	118.086	315.701	3.53068e+07
M118T299	118.086	299.493	4.55646e+07
M118T268	118.086	268.427	4.91171e+07
M118T365	118.086	365.061	5.4006e+07
M118T256	118.085	255.723	5.56143e+07
M118T209	118.086	208.905	6.24726e+07
M118T781	118.086	781.303	3.45287e+07
M118T722	118.086	722.193	5.23596e+07
M119T183	118.942	182.574	1.06966e+06
M119T203	118.942	203.36	4.10687e+06
M119T271	118.942	270.983	1.74717e+07
M119T69	118.942	69.2834	1.14026e+07
M119T191	118.942	190.962	2.25472e+06
M119T237	118.942	237.171	1.83787e+07
M119T56	118.963	56.1096	2.13877e+06
M119T50	118.963	50.041	998687
M119T68_1	118.963	68.0903	1.81268e+06
M119T46	118.983	46.447	1.21817e+06
M119T62	118.983	62.1777	2.67269e+06
M119T809	119.013	808.678	5.19351e+06
M119T794	119.013	793.649	8.71645e+06
M119T821	119.013	821.334	7.10782e+06
M119T211_1	119.016	211.288	4.94143e+07
M119T290	119.035	289.912	1.77729e+06
M119T211_2	119.033	211.288	5.60019e+06
M119T75	119.036	74.9588	7.73025e+07
M119T218	119.049	217.866	2.93095e+07
M119T210	119.06	210.186	2.59551e+06
M119T343	119.071	343.226	1.19311e+06
M119T405	119.072	404.872	1.03617e+07
M119T788	119.084	787.856	1.2291e+07
M119T669	119.085	668.867	1.62202e+07
M119T649	119.085	649.338	2.65994e+07
M119T31	119.085	31.4047	1.46684e+06
M119T682	119.085	681.885	1.33593e+07
M119T68_2	119.085	68.0903	1.37271e+06
M119T562	119.085	561.955	8.76318e+07
M119T718	119.085	717.959	1.18574e+07
M119T607	119.085	606.774	7.16492e+06
M119T740	119.085	740.014	6.24159e+06
M119T703	119.085	703.35	3.01021e+07
M119T753	119.085	752.541	7.1773e+06
M119T545	119.084	545.203	2.98405e+07
M119T694	119.085	693.81	1.27288e+07
M119T576	119.085	575.878	7.87129e+06
[truncated: 19,550 more rows]
