# Supplementary material for: Network Pharmacology and Experiment Verification to Explore the Potential Mechanism of Yin-Huo-Tang for Lung Adenocarcinoma Recurrence
Source: Research Square preprint supplement (doi:10.21203/rs.3.rs-956330/v1), 2021-10-12
Supplement: Supplementary file 2 [file 7224ca6e384adf117967d374.xlsx]

## Sheet: Sheet1
Targets of YHT	Tatgets of LUAD recurrence	The common targets between drug and disease
FOLR2	ALPQTL2	FOLR2
SLC5A6	SAI1	SLC5A6
PCCA	MTS1	PCCA
MUT	TFS1	PC
ACACB	SSU72	MTRR
PC	TNFRSF9	ACACA
MTRR	ILA	MCCC1
ACACA	CD137	MCCC2
PDXK	RERE	MTR
MCCC1	NEDBEH	SLC19A2
BLVRB	MTOR	HLCS
MCCC2	FRAP1	FOLR3
MTR	SKS	MMACHC
SLC19A2	SDHB	TPK1
HLCS	SDH2	RFK
FOLR3	SDHIP	PCCB
MMACHC	PGL4	MMAA
TPK1	PLA2G2A	VDR
RFK	PLA2B	MTHFR
PCCB	PLA2L	GLRA3
MMAA	MOM1	PRKCA
VDR	MUL1	HMGCR
MTHFR	MULAN	ITGB2
GLRA3	C1orf166	GABRB3
PRKCA	DDOST	ITGAL
HMGCR	OST	HDAC2
ITGB2	OST48	PRKCD
GABRB3	CDG1R	SOAT1
ITGAL	HSPG2	MTTP
HDAC2	PLC	CNR2
PRKCD	SJS	CNR1
SOAT1	SJA	SOAT2
MTTP	SJS1	DRD2
CNR2	EPHB2	PAWR
CNR1	EPHT3	KDM5D
SOAT2	DRT	ALKBH3
DRD2	ERK	TMLHE
PAWR	PCBC	P4HTM
KDM5D	CAPB	PLOD1
ALKBH3	BDPLT22	EGLN2
OGFOD2	ID3	ALKBH2
P3H3	RCAN3	BBOX1
TMLHE	DSCR1L2	PAM
P4HTM	MCIP3	DBH
PLOD1	CNKSR1	EGLN3
EGLN2	CNK1	PLOD3
ALKBH2	DHDDS	P4HA1
BBOX1	HDS	EGLN1
PAM	RP59	P3H2
SLC23A1	DEDSM	LCT
OGFOD1	CHC1	PLOD2
DBH	RCC1	P3H1
EGLN3	RNU17A	PHYH
PLOD3	RNE1	SLC27A2
P4HA1	CCDC28B	CRTAP
EGLN1	MGC1203	GBA3
P3H2	RSPO1	MAPK7
LCT	FLJ40906	MC3R
PLOD2	HEYL	CACNA1G
P3H1	ELOVL1	FTO
PHYH	SSC1	ESR1
SLC27A2	IKSHD	PCYT1A
CRTAP	SZT2	PHOSPHO1
GBA3	KIAA0467	ACHE
JMJD6	EIEE18	PLD2
PGLYRP2	PTPRF	BCHE
MAPK7	LAR	COLQ
MC3R	BNAH2	CYP27B1
CACNA1G	MUTYH	GC
SLC23A2	MYH	SNW1
FTO	TOE1	RXRB
ESR1	PCH7	SRD5A1
PLD1	MMACHC	CYP17A1
PCYT1A	RAD54L	SLC8A1
PCYT1B	HR54	F12
PHOSPHO1	HRAD54	RARRES1
ACHE	STIL	NR0B1
PLD2	SIL	TRPV1
BCHE	MCPH7	RARG
COLQ	OPHLC	PTGER1
CYP27B1	C1DUPp31.3	PTGER4
GC	DUP1p31.3	PGR
SNW1	DOCK7	AR
RXRB	KIAA1771	NR3C1
SRD5A1	EIEE23	RARB
CYP17A1	ALG6	RXRG
SLC8A1	CDG1C	OPRK1
F12	ITGB3BP	FADS2
RARRES1	NRIF3	FADS1
NR0B1	PGM1	PTGER2
TRPV1	GSD14	PTGS1
RARG	CDG1T	PTGER3
PTGER1	WLS	PTGS2
PTGER4	GPR177	ELOVL4
PGR	EVI	ALDH1A1
AR	TYW3	RARA
NR3C1	ACADM	ANXA1
RARB	MCAD	GPRC5A
RXRG	FAM73A	RXRA
OPRK1	MIGA1	ALDH1A2
FADS2	UOX	NR3C2
FADS1	GFI1	CYP19A1
PTGER2	ZNF163	PNPO
PTGS1	SCN2	IMPA1
PTGER3	DR1	AKR1C1
PTGS2	BCAR3	MAP2
ELOVL4	SH2D3B	BCL2
ALDH1A1	NSP2	NR1I2
RARA	DBT	MAPT
ANXA1	BCATE2	TUBB1
GPRC5A	HENMT1	MAP4
RXRA	C1orf59	IFNG
ALDH1A2	HEN1	TPMT
NR3C2	RBM15	LGALS9
PTGFR	SPEN	OCLN
CYP19A1	OTT	ADAM8
PNPO	LAMTOR5	EOMES
IMPA1	HBXIP	DNAJA3
AKR1C1	XIP	ADORA2A
MAP2	C1orf88	ADORA2B
BCL2	PIFO	ADORA3
NR1I2	ST7L	ADORA1
MAPT	ST7R	FBP1
TUBB1	MOV10	PRKAB1
TUBA4A	KIAA1631	ACSS2
MAP4	NRAS	POLE
IFNG	ALPS4	CBS
TPMT	NS6	POLE3
LGALS9	CMNS	ADCY1
OCLN	NCMS	COMT
ADAM8	SIKE	POLA1
EOMES	FCGR1B	DCK
DNAJA3	FCGR1C	RRM2B
ADORA2A	NBPF15	ADK
ADORA2B	MGC8902	GNMT
ADORA3	PIAS3	PNP
ADORA1	FCGR1A	PDE4D
FBP1	IGFR1	CBSL
PRKAB1	CD64	RRM2
ACSS2	CIART	PRKAA1
POLE	CHRONO	MAT1A
CBS	GM129	CREB1
POLE3	RPRD2	PIM1
ADCY1	FALEC	PYGL
COMT	FAL1	HINT1
POLA1	VPS72	MAT2A
DCK	CFL1	AMD1
RRM2B	YL1	ACSL1
ADK	ZNF687	PDE4B
GNMT	KIAA1441	PRKAB2
PNP	PDB6	RRM1
PDE4D	LCE3D	KCND1
CBSL	LEP16	ADH1A
RRM2	CHTOP	GAMT
PRKAA1	C10orf77	KCNC3
MAT1A	SRAG	KCNA1
CREB1	FOP	KCNA2
ACSS1	TPM3	TPO
PIM1	NEM1	CAT
PYGL	CFTD	KCNB1
POLE2	CAPM1	ADH1B
HINT1	IL6R	DLG4
MAT2A	IL6RQ	KCNC1
AMD1	IL6Q	ADH1C
ACSL1	PYGO2	KCNA5
PDE4B	PKLR	RNASE1
PRKAB2	PK1	KCND2
POLE4	MEX3A	ALDH2
RRM1	SMG5	KCNA4
KCND1	EST1B	KCND3
KCNA3	KIAA1089	GATM
ADH1A	NTRK1	KCNK4
KCNA10	TRKA	IYD
GAMT	ATP1A2	KCNQ1
KCNC3	FHM2	RBP3
KCNA1	MHP2	DHRS3
KCNA2	COPA	RDH5
TPO	AILJK	ALDH1A3
CAT	LY9	RDH12
KCNB1	FCER1G	RBP1
ADH1B	APOA2	RLBP1
DLG4	FCGR2A	LRAT
KCNC2	IGFR2	ADRA1A
KCNC1	CD32	HTR2A
ADH1C	FCGR3A	ADRA2A
KCNB2	CD16	HTR1B
KCNA5	IGFR3	HTR2C
RNASE1	IMD20	HTR1D
KCND2	FCGR2C	HTR1A
ALDH2	CD32C	ADRA1B
KCNA4	FCGR3B	DRD5
KCNA7	FCGR2B	DRD1
KCNA6	RGS4	ADRA2B
KCND3	RGS5	SLC6A2
GUCY1B3	NUF2	HTR2B
GATM	NUF2R	DRD4
KCNK4	CDCA1	HTR7
IYD	PBX1	ADRA2C
KCNQ1	CAKUHED	DRD3
RDH11	MAEL	DNMT3A
RBP3	CREG1	PHKG2
RETSAT	SCYL3	CHRNA7
RDH13	PACE1	INS
DHRS3	FMO2	SLC22A1
RDH5	EEF1AKNMT	CD34
ALDH1A3	METTL13	CALCA
RDH12	FEAT	HTR4
DHRS4	KIAA0859	GABRA2
RBP1	DFNB26M	GABRD
RLBP1	MIR3120	GABRB1
RDH14	FASLG	GABRG3
RDH8	TNFSF6	GABRE
LRAT	APT1LG1	GABRA3
ADRA1A	FASL	GABRA4
HTR2A	ALPS1B	GABRB2
ADRA2A	RGSL2	HTR3D
HTR1B	PDCN	GABRQ
HTR2C	NPHS2	GABRA5
ADRA1D	SRN1	HTR3E
HTR1D	RGSL1	GABRA6
HTR1F	RNASEL	HTR3A
HTR1A	RNS4	GABRA1
ADRA1B	PRCA1	GABRG2
DRD5	HPC1	SLCO2B1
DRD1	RGS16	HTR3C
ADRA2B	SMG7	TRPV3
SLC6A2	EST1C	TRPM8
HTR2B	KIAA0250	TRPA1
DRD4	NCF2	SCN11A
HTR7	ODR4	SCN2B
ADRA2C	C1orf27	ABAT
DRD3	RGS21	SCN1A
DNMT3A	RGS1	SCN3B
PHKG2	IER1	SCN3A
APLP1	IR20	SCN7A
CHRNA7	CFHR3	SCN5A
INS	FHR3	SCN10A
SLC22A1	HLF4	AKR1D1
CD34	CFHL3	ALDH5A1
CALCA	CFHR1	SCN2A
HTR4	FHR1	HDAC9
GABRA2	HFL1	TYR
GABRD	CFHL1	SCN9A
GABRB1	GUK2	SCN4A
GABRG3	TIMM17A	SCN4B
HTR6	TIM17A	SRD5A2
GABRE	RABIF	ACADSB
GABRA3	RASGFR3	SCN8A
GABRG1	MSS4	SCN1B
GABRP	ZBED6	OGDH
GABRA4	MDM4	CXCR4
GABRB2	DSTYK	VKORC1
HTR3D	KIAA0472	NQO1
GABRQ	RIP5	ATP1A1
HTR3B	DUSTYPK	TYMS
GABRA5	CAKUT1	NT5C2
HTR3E	SPG23	IMPDH1
HTR1E	BLACAT1	ENPP1
GABRA6	LINC00912	POLB
HTR3A	RASSF5	TERT
GABRA1	NORE1	DNMT1
GABRG2	IL10	MTNR1A
SLCO2B1	CSIF	MTNR1B
HTR3C	GVHDS	DCT
TRPV3	IL24	TYRP1
TRPM8	ST16	NFKB2
TRPA1	MDA7	TNF
SCN11A	FCAMR	MMP9
SCN2B	YOD1	F2
ABAT	OTUD2	SLC6A3
SCN1A	DUBA8	S1PR5
SCN3B	IRF6	ADRB2
SCN3A	VWS	MAOB
SCN7A	LPS	ADRB1
SCN5A	PIT	MAOA
SCN10A	PPS1	SLC6A4
AKR1D1	OFC6	SLC18A2
ALDH5A1	KCNH1	ALOX5
SCN2A	EAG	ADRB3
HDAC9	TMBTS	CARTPT
TYR	ZLS1	ALDH3A1
SCN9A	DTL	RHO
SCN4A	RAMP	RS1
SCN4B	DCAF2	WNT4
SRD5A2	CDT2	PTGIS
ACADSB	DEL1q41q42	CYP11B1
SCN8A	C1DELq41q42	CYP11B2
SCN1B	RRP15	CACNA1H
OGDH	ENAH	SERPINB7
CXCR4	ENA	PLAT
CRYZ	MENA	THBD
VKORC1	NDPP1	PPARG
NQO1	LIN9	FABP2
ATP1A1	ACTA1	CFTR
TYMS	ASMA	LPL
NT5C2	NEM3	CETP
IMPDH1	CFTD1	PDE10A
ENPP1	SHPM	HSD17B1
POLB	PCAP	PROS1
TERT	COG2	PROZ
DNMT1	LDLC	NQO2
MTNR1A	CDG2Q	DHODH
MTNR1B	TOMM20	F7
DCT	MAS20	F9
TYRP1	KIAA0016	GGCX
NFKB2	RGS7	F10
TNF	FH	PROC
MMP9	HLRCC	BGLAP
F2	MCUL1	PTGIR
GPR27	FMRD	PDE3A
SLC6A3	EXO1	PDE3B
S1PR5	HEX1	LTA
ADRB2	SDCCAG8	ESR2
MAOB	CCCAP	PDE5A
ADRB1	SLSN7	PDE4A
MAOA	BBS16	RYR1
SLC6A4	SPGF2	ITPR1
SLC18A2	ASG	PDE6A
ALOX5	ID2	PRKDC
ADRB3	KLF11	PIK3CD
TAAR1	TIEG2	PGD
CARTPT	FKLF1	PIK3CA
ALDH3A1	FKLF	PIK3CB
RHO	MODY7	ITPR2
RS1	ODC1	ITPR3
WNT4	GACAT3	PDE4C
PTGIS	LINC01458	ATM
CYP11B1	SMC6L1	PDE2A
CYP11B2	SMC6	PDE8B
CACNA1H	GEN1	NT5E
VKORC1L1	ODD	PDE6C
SERPINB7	OSR1	PDE11A
PLAT	PUM2	RINT1
THBD	KIAA0235	RIPK1
PPARG	EFR3B	PIK3R1
FABP2	KIAA0953	TACR2
CFTR	GAREM2	AMPD3
LPL	HADHA	CX3CR1
CETP	MTPA	ADA
PDE10A	KCNK3	HAP1
HSD17B1	TASK	IDNK
PROS1	PPH4	RPL3
PROZ	CAD	CACNA1C
NQO2	CDG1Z	TRDMT1
DHODH	EIEE50	DHFR
F7	SUPT7L	SHMT1
F9	SUPT7H	DMTN
GGCX	SPT7l	KCNMA1
F10	KIAA0764	SCNN1A
PROC	STAF65G	KCNJ8
BGLAP	SPDYA	SCNN1G
PTGIR	SPY1	MTAP
PDE3A	RINGOA	TLR8
PDE3B	LBH	APRT
LTA	MEMO1	PECR
ESR2	MEMO	HRH1
PDE7B	C2orf4	HRH2
PDE5A	DPY30	AOC3
PDE9A	SOCS5	SRPK2
PDE4A	CIS6	TLR7
RYR1	KIAA0671	KCNJ1
ITPR1	MCFD2	AGTR1
PDE6A	F5F8D2	ACP1
PRKDC	EPCAM	SCNN1B
PIK3CD	ACSTD1	CYP2B6
PGD	TROP1	SCT
PIK3CA	M4S1	UGCG
PDE1A	MIC18	ARRB2
PIK3CB	DIAR5	RAB7A
ITPR2	HNPCC8	PRKAA2
PDE1B	MSH2	ALDH3A2
PDE7A	COCA1	ARRDC3
ITPR3	FCC1	HPRT1
POLA2	HNPCC1	ACTN2
PDE4C	MSH6	DDC
PDE1C	GTBP	DGUOK
ATM	HNPCC5	XDH
PDE6B	CHAC2	SLC7A8
PDE2A	EFEMP1	TH
PDE8B	FBNL	TAT
NT5E	DHRD	FARS2
PDE6C	EHBP1	PAH
PDE11A	KIAA0903	FARSB
PDE8A	HPC12	CHRM3
RINT1	OTX1	CHRM1
RIPK1	WDPCP	CHRM2
PIK3R1	C2orf86	PPARD
TACR2	BBS15	ACSL4
AMPD3	CHDTHP	CKMT1B
CX3CR1	VPS54	CKM
ADA	VPS54L	SLC6A8
HAP1	WR	CKB
IDNK	PELI1	APOA2
RPL3	PNO1	IL1B
CACNA1C	MOGS	SLC9A1
TRDMT1	GCS1	IL13
DHFRL1	CDG2B	SC5D
DHFR	DOK1	LPCAT1
SHMT1	IGKV@	COL27A1
DMTN	PARTICL	HSD11B1
KCNMA1	GGCX	NCOA2
SCNN1A	VKCFD1	KCNH2
KCNJ8	SFTPB	CHRNA2
SCNN1G	SFTB3	OPRM1
MTAP	SMDP1	BAX
TLR8	ZFP103	CASP9
APRT	KF1	JUN
PECR	COPD	CASP3
HRH1	CREG2	CASP8
HRH2	C2orf40	PON1
SCNN1D	ECRG4	NCOA1
AOC3	COMA	GSK3B
SRPK2	EDAR	PRSS1
TLR7	DL	CCNA2
KCNJ1	ED3	GRIA2
AGTR1	EDA3	LYZ
ACP1	HRM1	AKR1B1
SCNN1B	ECTD10A	PLAU
CYP2B6	ECTD10B	LTA4H
SAXO1	BUB1
SCT	LCO
UGCG	IL1A
ARRB2	IL1B
RAB7A	IL1RN
PRKAA2	MVCD4
HSP90AB1	DIRA
ALDH3A2	NIFK
CALCOCO2	MKI67IP
AOC2	NOPP34
ARRDC3	PROC
HPRT1	PC
ACTN2	THPH3
DDC	THPH4
ITFG2	CCDC115
DGUOK	CCP1
XDH	CDG2O
SLC7A8	IMP4
TH	BXDC4
TAT	EPC2
FARS2	SCN9A
PAH	NENA
FARSA	PN1
FARSB	FEB3B
CHRM3	GEFSP7
CHRM1	SFNP
CHRM2	HSAN2D
FFAR1	DUP2q31.1
PPARD	C2DUPq31.1
ACSL4	LNPK
ACSL3	KIAA1715
CKMT1B	NEDEHCC
CKM	HOXD10
SLC6A8	HOX4D
CKMT2	SCHLAP1
CKMT1A	PCAT114
CKB	LINC00913
APOA2	ITGA4
IL1B	CD49D
SLC9A1	NEUROD1
IL13	NIDDM
SC5D	DIRC1
SLC16A12	STAT1
LPCAT1	CANDF7
COL27A1	IMD31A
HSD11B1	IMD31B
NCOA2	IMD31C
KCNH2	STAT4
CHRM4	SLEB11
CHRNA2	BOLL
OPRM1	BOULE
BAX	NIF3L1
CASP9	CASP10
JUN	MCH4
CASP3	ALPS2
CASP8	CASP8
PON1	MCH5
PKIA	ALPS2B
NCOA1	NOP58
GSK3B	NOP5
PRSS1	BMPR2
CCNA2	PPH1
GRIA2	POVD1
LYZ	TP53
AKR1B1	BRCA2
PLAU	EGFR
LTA4H	BRCA1
CTRB1	PTEN
	KRAS
	IL6
	ATM
	TNF
	ERBB2
	CDKN2A
	APC
	MLH1
	CDH1
	VEGFA
	STAT3
	BRAF
	PIK3CA
	TGFB1
	AKT1
	TERT
	CTNNB1
	CHEK2
	CCND1
	STK11
	HRAS
	SMAD4
	RB1
	MYC
	ALB
	ESR1
	CXCR4
	IFNG
	FGFR3
	MET
	FAS
	MAPK1
	EGF
	TLR4
	CDKN1A
	NOTCH1
	TGFBR2
	CDK4
	NKX2-1
	FGFR2
	IGF1
	ALK
	KIT
	MDM2
	RET
	CDKN1B
	CCR6
	MIR21
	NFKB1
	FGFR1
	DICER1
	CAV1
	SRC
	IGF1R
	MMP1
	BAX
	CD40LG
	MTHFR
	SPP1
	PIK3R1
	TP63
	ERCC2
	FN1
	CTLA4
	XIAP
	CXCL12
	EP300
	FOXP3
	RAD51
	PPARG
	IGF2
	ELANE
	CFTR
	VEGFC
	CCL2
	PDGFRA
	NFE2L2
	ANXA5
	PDGFRB
	CXCL8
	PLAU
	CD8A
	MGMT
	AXIN2
	NBN
	MAP2K1
	FHIT
	BMP4
	EZH2
	SMARCA4
	NF1
	ERCC1
	H19
	TNFRSF1A
	MPO
	PMS2
	MMP9
	SMAD3
	FLT1
	F2
	ERCC6
	JAK2
	RARB
	BCL2
	BAP1
	TYMS
	SOX2
	SLC2A1
	TSC2
	PALB2
	INS
	TERC
	ICAM1
	ERBB3
	TYMP
	TLR2
	RAC1
	DNMT3B
	DNMT1
	AR
	ESR2
	FOS
	NOS2
	RAF1
	RELA
	PTGS2
	AKT2
	IL13
	MIR17
	TOP2A
	MMP2
	MIR34A
	MIR145
	MUC1
	MIR155
	AURKA
	FLT4
	MIR125A
	CDKN2B
	PDGFB
	MIR126
	CD40
	HLA-DRB1
	GLI1
	ACE
	TWIST1
	CREB1
	VHL
	JAK3
	IL2RA
	MIR146A
	TP73
	MEG3
	TSC1
	TNFRSF10B
	SNAI2
	MIR31
	ELN
	BMP2
	CTSB
	PROM1
	PDCD1
	BIRC3
	ADA
	CSF3
	ZEB1
	NFKBIA
	HSPB1
	MIR142
	GJA1
	CASP3
	ERBB4
	OGG1
	TIMP3
	AKT3
	B2M
	TGFBR1
	CYP1B1
	ENG
	BRIP1
	MIR221
	MIR143
	ABCC2
	DPYD
	MIR27A
	SPARC
	DLEC1
	DNMT3A
	GSTM1
	PTPRC
	MIR214
	CD274
	SETD2
	CD79A
	CDC42
	LEP
	ABCB1
	HIF1A
	SFTPC
	SERPINA1
	MIR200A
	IKBKB
	MIR223
	MIR200C
	WT1
	IL2
	GSTP1
	DDR2
	CRP
	MIR205
	CHEK1
	MIR222
	STAT5B
	MIR182
	IL4
	XRCC3
	GSN
	GNAS
	GATA2
	RARA
	MIR195
	U2AF1
	MIR141
	HLA-G
	IRS1
	MIR200B
	DOCK8
	MYCN
	CAT
	BIRC5
	MIR148A
	ZEB2
	HMOX1
	JUN
	CD44
	POLE
	XPA
	IRF1
	MIR150
	MIR183
	ITGA3
	MSH3
	MIR29A
	MIR483
	PGR
	HLA-B
	CYP1A1
	F5
	NOD2
	VDR
	MIRLET7A1
	CEACAM5
	MIR20A
	SERPINC1
	CCN2
	FGF2
	CSF2
	CYP2D6
	MIR193A
	MIR203A
	MIR140
	PLG
	MIR210
	KRT5
	MIR22
	FGFR4
	ROS1
	PRKN
	KLF6
	VWF
	PRTN3
	MBL2
	PTPN11
	KDR
	IDH1
	HLA-A
	TNFRSF1B
	MIR144
	ERCC4
	MRE11
	ABCA3
	MIR34C
	RAD51C
	FLCN
	ITGA6
	BDNF
	MIR106B
	LAMC2
	APOE
	HLA-DQB1
	MIR30E
	MIRLET7B
	XRCC1
	MIR15A
	MIR96
	JUP
	SMAD7
	MIR18A
	PIK3R2
	STK4
	MIR99A
	KITLG
	PTCH1
	MAP2K2
	CCL3
	MIRLET7D
	MIR25
	MUC5B
	RASSF1
	IL4R
	MIR335
	COL1A1
	MIR204
	HMGA2
	SOS1
	TLR3
	BTK
	MKI67
	TNFSF11
	NOTCH3
	MIR181A1
	TAP1
	MIR100
	TIMP1
	KCNQ1OT1
	HGF
	NLRP3
	MIR93
	NOS3
	IL7
	CDKN3
	COMT
	KRT19
	BMPR1A
	BCL2L1
	RAD50
	HPGD
	MIR224
	TGFB2
	MIR199B
	MEN1
	ERCC5
	SMARCB1
	CD55
	CD19
	DDB2
	BARD1
	ACTA2
	IL17A
	SPINK1
	ENO2
	TNFSF10
	ABCC1
	MIR15B
	POMC
	CREBBP
	MIR23A
	ZMYND10
	MIR19A
	FLNA
	MIR424
	TNFRSF13B
	CASP9
	MAPK8
	MIR26A1
	MIR191
	MIR486-1
	ATR
	IKBKG
	MIR451A
	MIR373
	PTK2
	MIR146B
	MIR16-1
	RMRP
	TFAP2A
	PARP1
	ALOX5
	ASCL1
	CCND2
	SOD1
	KRT14
	ABCG2
	UGT1A1
	MAPK3
	KRT7
	IGFBP3
	ABL1
	PPP2R1B
	MIR128-2
	MIR106A
	NOTCH2
	PCNA
	MIR34B
	GRP
	ADIPOQ
	MIR192
	HFE
	DES
	FGF10
	NQO1
	SERPINE1
	CD28
	CD4
	CYCS
	COL18A1
	MAX
	CHRNA3
	MYD88
	TOP1
	MIRLET7G
	YAP1
	IL2RB
	MALAT1
	MT-CO1
	IGF2R
	MIR185
	TGFA
	DKC1
	IL7R
	MIR107
	RAG1
	MMP7
	GPC3
	LAMB3
	SP1
	TLR5
	MIRLET7C
	HOTAIR
	SOD2
	PRSS1
	PLAUR
	E2F1
	PRKCD
	CCL11
	SOX9
	ITGAM
	KRT18
	WRN
	MIRLET7E
	MIR10A
	WNT5A
	MIR296
	NFKB2
	MIR324
	LIG4
	KLK3
	STAT6
	KRT20
	NF2
	ZAP70
	PLAT
	HLA-DQA1
	MMP14
	TRIP13
	CDK2
	FBN1
	MAPK14
	RAD51D
	CDK1
	PRKDC
	SERPINA3
	GATA4
	MUC16
	CYP17A1
	JAG1
	HSP90AA1
	CD36
	FADD
	MIR331
	CCL5
	HAVCR2
	TFRC
	MIR32
	MIR137
	ETS1
	ITGB1
	SFTPA1
	MIR29B2
	ADRB2
	SHH
	MCL1
	TIMP2
	SFTPD
	RUNX2
	MIRLET7I
	MIR10B
	EDN1
	MIR30B
	SNAI1
	CALR
	MIR133B
	ACTC1
	CR2
	GLI3
	RTEL1
	MIR24-2
	VIM
	NGF
	CYP19A1
	MEFV
	CHGA
	MIR499A
	MIR130A
	TCF7L2
	ITGB3
	ARID1A
	TLR9
	WNT1
	MIR342
	BMP6
	H2AC18
	PRKAR1A
	NME1
	EDNRA
	MECP2
	MUC5AC
	SYP
	RHOA
	CDK6
	IL18
	CCNB1
	CTNNA1
	RPSA
	CCNA2
	CXCR1
	MIR148B
	ITGA2B
	ACVRL1
	WWOX
	POU5F1
	MMP3
	DLK1
	FANCD2
	TNFRSF11B
	SFTPA2
	REN
	LEPR
	SH2D1A
	YWHAE
	NPM1
	TYR
	HLA-DPB1
	MIRLET7A3
	IL5
	DCLRE1C
	GFAP
	LTA
	SMAD2
	DKK1
	PIK3CG
	BUB1B
	HMGB1
	COL4A3
	TGFB3
	BCL10
	KEAP1
	MIR30D
	THBS1
	MIR197
	GATA3
	IL3
	TNFRSF13C
	NTRK2
	FOXM1
	AHR
	HNF1B
	COL2A1
	MYLK
	RPS6KB1
	MIR198
	PRKCA
	KRT8
	LMNA
	MIR378A
	SLC6A4
	IFIH1
	SMPD1
	NTRK3
	FGF8
	MIR199A1
	FOXO1
	TG
	HDAC1
	CDH2
	CYBB
	IL12RB1
	MIR375
	LOX
	POLD1
	IL2RG
	G6PD
	HSPA4
	PLK1
	BSG
	APEX1
	GREM1
	CCNE1
	BAK1
	BMI1
	EPHB4
	EDNRB
	XPC
	TNFRSF10A
	NRG1
	FGF7
	ITGB2
	PROS1
	WAS
	TTR
	SLC22A18
	MIR33A
	LGALS3
	MIR372
	MIR30A
	MVP
	CALCA
	MIR181C
	HSPA5
	SERPINB5
	CFLAR
	SOX4
	AREG
	PTH
	MALT1
	IFI27
	SKP2
	COL4A2
	THPO
	GUSB
	EZR
	COL1A2
	NAT2
	MUC4
	MIR23B
	CASR
	BLM
	MIR9-1
	ITGB4
	SDHD
	PTHLH
	CDKN1C
	PNP
	C3
	XRCC2
	IFNA1
	AGTR1
	BCR
	CHD7
	GADD45A
	AFP
	ARAF
	DAPK1
	CD34
	RUNX3
	PVT1
	ALDH1A1
	STIM1
	PSAP
	HDAC9
	CXCL1
	ICOS
	F3
	SST
	ANGPT2
	WRAP53
	ICOSLG
	BCL2L11
	TGFBI
	HYDIN
	MIR29C
	HPRT1
	FANCC
	MIF
	VEGFD
	HELLS
	CSF1
	IFNGR1
	NCAM1
	CXCR2
	SQSTM1
	EIF4E
	FLT3
	CD24
	IL17F
	CTSK
	NRP1
	RAG2
	CYP3A4
	CA9
	AICDA
	INSR
	TCF3
	MIR127
	S100A4
	CD46
	MS4A1
	LCK
	EPHX1
	DSP
	CYP2E1
	CCR7
	FASN
	IGHM
	PRF1
	MT-CYB
	PECAM1
	CD81
	WNT3
	TINF2
	CR1
	POSTN
	FOXO3
	CYP2A6
	IDH2
	GSTT1
	CHRNA5
	ETV6
	TF
	MAD1L1
	C4A
	DHFR
	XRCC5
	UCA1
	TXN
	PON1
	BAD
	CTSD
	PSMB8
	GRB2
	CIITA
	GBA
	HABP2
	F13A1
	CHI3L1
	RYR1
	GHRL
	EPHA2
	STMN1
	GATA6
	CTAG1B
	COL3A1
	ENO1
	FANCA
	TTN
	XRCC6
	PML
	FSCN1
	CDKN2B-AS1
	SCGB1A1
	RECQL4
	E2F3
	CFH
	CYBA
	TNFRSF11A
	GDF15
	NPRL2
	KMT2D
	CYP27B1
	CASP7
	MSLN
	ITGAV
	EWSR1
	AGT
	GAS5
	HLA-DPA1
	PIK3C2A
	MIR196A1
	GAPDH
	TKT
	CXCL10
	HBEGF
	ALPL
	MMP12
	LGALS1
	AXIN1
	ACP5
	BECN1
	PARN
	IFNA2
	MMP13
	CCND3
	PTPN22
	FBXW7
	MVK
	SMARCA2
	RELB
	MTAP
	TUG1
	NEAT1
	SCNN1A
	PIK3CB
	DIABLO
	PTK2B
	CLEC7A
	RECK
	MIR132
	PPM1D
	MIR152
	LRP5
	CD82
	NAGLU
	GDNF
	ATP8B1
	SELE
	GHR
	CBL
	KCNQ1
	DMBT1
	FOXC2
	WNT3A
	ERCC3
	CTCF
	AXL
	STS
	MECOM
	SOCS3
	MAGEA1
	KDM6A
	VCAM1
	TYK2
	GRN
	CFI
	SLC11A1
	EGR1
	PAX5
	CCAT1
	PLCG1
	CEACAM7
	BIRC2
	ABCA1
	NHEJ1
	SPINK5
	PXN
	CTNND1
	FLNB
	KRT13
	IGFBP2
	FGF23
	MLH3
	AURKB
	GSK3B
	EHMT1
	ABCC3
	APP
	CD247
	NSD1
	ANGPT1
	FBLN5
	CHUK
	LIMK1
	CADM1
	DMD
	LRRC56
	CTSC
	TRPS1
	SUFU
	PIK3CD
	SCNN1B
	FCN3
	FLNC
	MIR122
	TET2
	TBX1
	KMT2A
	SCNN1G
	IL1R1
	MAPT
	NANOG
	NLRP7
	AVP
	IL17RA
	PLA2G4A
	PDCD4
	PSMB9
	MIR149
	PAK1
	F8
	XIST
	MIR125B1
	EPOR
	MAGEA3
	NLRC4
	HP
	MSN
	LPL
	IL21
	SETBP1
	MIR532
	CACNA1A
	PTGS1
	ARID1B
	HNF4A
	F10
	COL11A1
	PITX2
	HBB
	USB1
	RARS1
	ATRX
	APOA1
	CCAT2
	TCIRG1
	SOCS1
	PAEP
	ITGA2
	MIR139
	PDPN
	FOXP1
	MIR206
	IL15
	EPO
	CXCR3
	CHRM3
	ETV4
	IL12B
	HTR2A
	MYH7
	MIR124-1
	IL6ST
	SELP
	CLU
	NAT1
	TAP2
	ABCB11
	KDM4C
	SSTR2
	E2F2
	ILK
	MME
	CDC25C
	PAX6
	NHP2
	THBD
	S100B
	SLPI
	ARG1
	NCF1
	GNRH1
	DCK
	SIRT1
	IGH
	CCKBR
	FANCG
	CDC25A
	MMP11
	GRPR
	CASC2
	OFD1
	CYP3A5
	FAT4
	ROCK1
	GNAQ
	FOXE1
	ITK
	GATA1
	FLG
	LIFR
	NR3C1
	FLI1
	LAMA2
	RAP1A
	LYST
	GALNS
	APOB
	CACNA1C
	LINC-ROR
	TUBB
	DNAH5
	DNAH8
	GAST
	COX5A
	MITF
	FGA
	MIR320A
	CDC6
	CEACAM3
	HLA-C
	CDX2
	NOP10
	ANXA1
	MAGEA4
	NR1H4
	CDKN2C
	SERPINB3
	MTR
	CA2
	MIR193B
	REST
	RETN
	PRL
	PLCG2
	RXRA
	INPPL1
	CARD11
	LRBA
	MIR29B1
	ATP7A
	UNG
	MIR423
	HDAC4
	ROBO1
	JAK1
	MYH9
	ABCB4
	HOTTIP
	MIR338
	NR3C2
	GPT
	MYH11
	MST1R
	POLK
	KRT17
	KLF4
	LBR
	MSMB
	MIR181A2
	ECM1
	VCP
	CD80
	CPT2
	AIRE
	P2RX7
	COL11A2
	WNT4
	SERPINH1
	NODAL
	CCR5
	CD3D
	DNAAF2
	GJB2
	PGM3
	FOXF1
	HYAL1
	MIR101-1
	CD9
	PRLR
	FANCM
	MCM4
	KRT10
	SDHC
	PAX3
	RPGR
	ANXA2
	GUCY2C
	CEBPA
	TFE3
	IKZF1
	TNNI3
	HSPD1
	SLC6A3
	MRAP
	MIR181B1
	MIR24-1
	ANPEP
	ACTN4
	HOXB13
	SDHA
	IL23R
	TNFSF12
	TRAF6
	MIR497
	CRKL
	AP3B1
	DSG1
	CTC1
	VIP
	AFAP1-AS1
	CEACAM1
	STAT5A
	EREG
	CD70
	GLB1
	CD79B
	CTSL
	RSPH4A
	SNCA
	CISH
	GAL
	IL12A
	MPL
	CX3CR1
	FKBP5
	MIR429
	BMP1
	SF3B1
	PSTPIP1
	RECQL
	PSEN2
	FGF1
	CSF1R
	HMGA1
	MAP3K8
	PIK3R3
	CSF3R
	SAA1
	GAA
	DNAH11
	CEACAM6
	TGM1
	BCL6
	WIF1
	KLLN
	MIR196A2
	EPHA3
	SCN5A
	ARSA
	EIF2AK3
	MIR30C1
	HDAC2
	PSG2
	BGLAP
	CALM1
	RUNX1
	MAPK10
	CSF2RA
	DNAI2
	PSAT1
	GZMB
	MTA1
	RNASE3
	NPPB
	FMR1
	SEMA3A
	GLA
	WDR19
	BCOR
	PGF
	CALB2
	MIR376A1
	UCHL1
	NR5A1
	SPRY4-IT1
	PRKCB
	SNHG1
	TUSC3
	PTGER4
	TK1
	ENPP2
	DNAAF4
	CCDC39
	CCL17
	TSHR
	HCRT
	CCNO
	RYR2
	IDUA
	ELAC2
	RRM2
	FANCF
	RIPK1
	ITGA5
	CDC73
	CDCA7
	CD2AP
	AKR1B10
	RAC2
	RSPH9
	RASA1
	ADH1C
	PKD1
	C4B
	SMARCE1
	CXCL5
	RAB27A
	PMS1
	H2AX
	NKX2-5
	MMP10
	TCF4
	CD86
	HOXA11-AS
	MED12
	LCN2
	PEPD
	PCAT1
	SYK
	ZFAS1
	SHBG
	DNAAF5
	DDR1
	NLRP1
	CCBE1
	EIF4EBP1
	SOX2-OT
	MIR186
	PTH1R
	MIR574
	LDLR
	S100A9
	ROR2
	CXCL9
	ABRAXAS1
	CDH13
	CLDN7
	ADA2
	DVL1
	MGP
	ASAH1
	RSPH1
	S100A8
	G6PC3
	EGFR-AS1
	TEK
	DLL4
	FOXC1
	DHCR7
	TRIM28
	CYP1A2
	ACTB
	CYP21A2
	IRS2
	PAX2
	TRAF3
	SNHG16
	ASXL1
	FOLR1
	TBX5
	PDGFA
	SLC19A1
	AGER
	HERC2
	ATP11A
	NCF4
	PLP1
	F2R
	NSD2
	TCF7
	NLRP12
	CCDC114
	EFEMP2
	EPAS1
	NEU1
	DNAH1
	ADAM12
	APRT
	PKM
	ATP7B
	SBDS
	APOH
	HNRNPA2B1
	YBX1
	MIR328
	CCDC40
	TCOF1
	SOX10
	GAS8
	SLC26A2
	SEMA3B
	EML4
	YY1
	IRF5
	ZIC3
	CARD9
	VTN
	LTBP4
	STING1
	DNAAF1
	MIR184
	RIOX2
	TIMELESS
	NR0B1
	DNAI1
	SPAG1
	MTDH
	SLC29A1
	F9
	MYOD1
	TGM2
	DANCR
	SELL
	GMNN
	NME8
	FIP1L1
	NAB2
	ADAM17
	SLC52A3
	MIR361
	PANDAR
	IL10RA
	MIR377
	ERG
	CCR1
	NUP214
	MIR138-1
	HDGF
	CCL4
	ATF6
	CBFB
	MTUS1
	MBTPS2
	TNNT2
	MAP3K7
	ARMC4
	KAT6B
	PTPN3
	NR1H2
	NEK9
	STN1
	TRAF2
	BCAR4
	IGHE
	MIR133A1
	PRDM16
	TNFRSF8
	FANCB
	LAT
	SMC1A
	ADH1B
	CD3E
	RFX5
	CHAT
	NPPA
	SSX2
	CIB1
	LUCAT1
	RFXANK
	HTR1A
	MAGEC2
	SEZ6L2
	SERPINF1
	KCNH2
	BANCR
	MT-CO2
	SYNE1
	IL11
	APAF1
	CFAP298
	DNAAF3
	CDCP1
	POT1
	LAMA5
	EIF2AK2
	ALDH2
	LAMC1
	TP53BP1
	MIR130B
	MT-ND1
	DNASE1
	EPB41L3
	CFB
	MIR542
	MB
	CTTN
	PLOD1
	MIR339
	RFXAP
	TNFAIP3
	ADAMTS13
	CCDC103
	MC2R
	MC1R
	CASP1
	TLR1
	IGLL1
	RASGRP1
	BLNK
	MSR1
	GGT1
	IGFBP5
	MIR27B
	PRODH
	DBH
	PRKD1
	HPS6
	IL9
	TAC1
	RRM1
	IFNB1
	MIR125B2
	SRD5A2
	NPC1
	MARS1
	MUC7
	TRPV4
	MASP2
	IREB2
	SAT1
	TP53COR1
	LPIN1
	TH
	SRP54
	MIR503
	MIR128-1
	CASP2
	MIR330
	FUS
	CC2D2A
	HAGLR
	SLC25A13
	HAX1
	STX1A
	MYCL
	GNPTAB
	BIRC7
	FOXJ1
	LRRC6
	GLI2
	F7
	RPL11
	GADD45G
	NES
	RBP4
	CDA
	PRKACA
	SOX11
	RPL5
	PIP
	HTRA1
	MUC6
	F2RL3
	MIR151A
	LHCGR
	SHC1
	FAM13A
	KRT1
	TRAF1
	TUSC7
	PHB
	PSEN1
	C1S
	ASS1
	DRC1
	GDF2
	RPS6KA3
	C5
	MUSK
	CCL22
	HPS1
	STAR
	CORO1A
	MIR103A1
	CXCL2
	MMP8
	CCDC65
	IL21R
	ACVR1
	IL33
	CBS
	DLC1
	ELAVL1
	FUCA1
	IGFBP1
	HMGCR
	BRD4
	NPC2
	COL5A2
	DUOX2
	CCL18
	SLC34A2
	HYAL2
	LIF
	CRELD1
	CCR3
	CCK
	DNAL1
	CD14
	ALDOA
	NCR1
	ACAN
	DYNC2H1
	GALNT3
	FZD4
	HNF1A-AS1
	DLL3
	CLN3
	CLCN5
	SMN1
	PLCB1
	ATG7
	CP
	MIR455
	ELAVL4
	NCOA3
	CEP290
	LZTR1
	SGSH
	BAG1
	BCYRN1
	OCRL
	ARSB
	MIR708
	SELENON
	EIF2AK4
	HPSE
	LTF
	PSMB4
	SNHG12
	SNHG15
	CFC1
	IFT140
	TBX4
	MIR340
	LNCRNA-ATB
	CCN1
	WNT7B
	PRKCI
	INVS
	MIR212
	KIAA0586
	SEMA3F
	ADM
	MAP2K4
	ANTXR2
	DSC3
	CLDN4
	CCDC151
	PF4
	UMPS
	NCOR1
	TINCR
	TLR7
[truncated: 9,171 more rows]
